# Supplementary material for: A carbanion induced ring switching synthesis of spiranes: an unprecedented approach
Source: Royal Society of Chemistry journal article supplement (doi:10.1039/c2ra21587j), 2012-01-01

## Supporting Information

# A Carbanion Induced Ring Switching Synthesis of Spiranes: An Unprecedented Approach

Hardesh K. Maurya,<sup>a,e</sup> Ramendra Pratap,<sup>c</sup> Abhinav Kumar,<sup>a</sup> Brijesh Kumar,<sup>b</sup> Volker Huch,<sup>d</sup> Vishnu K. Tandon,<sup>\*,a</sup> Vishnu Ji Ram<sup>\*,a</sup>

<sup>a</sup>Department of Chemistry, Lucknow University, Lucknow 226007, India,

<sup>b</sup>Division of SAIF, Central Drug Research Institute, Lucknow 226001, India

<sup>c</sup>Department of Chemistry, Delhi University, New Delhi 110007, India

<sup>d</sup>Institute of Inorganic Chemistry, University of Saarland, Saarbrücken, Germany.

<sup>e</sup>Medicinal Chemistry Department, Central Institute of Medicinal and aromatic Plants, PO. CIMAP, Kukrail Road, Lucknow-226015, India

vjiram@yahoo.com

### Contents:

|                                                                                   |   |
|-----------------------------------------------------------------------------------|---|
| Perspective view of <b>11d</b> and <b>17a</b> showing absolute configuration..... | 1 |
| XYZ Coordinates for dimer of <b>11d</b> .....                                     | 2 |
| Optimized XYZ coordinates for monomer of <b>11d</b> .....                         | 4 |
| Optimized XYZ coordinates for <b>17a</b> (Ground State) .....                     | 5 |
| Optimized XYZ coordinates for <b>17a</b> (Transition State) .....                 | 6 |
| Copies of HRMS and NMRs Spectra.....                                              | 8 |

### Perspective view of **11d** Showing absolute configuration:

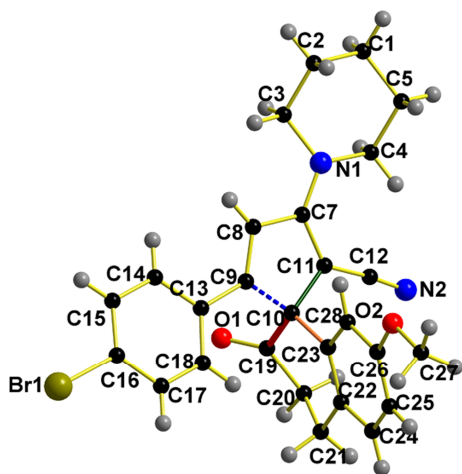

**11d**

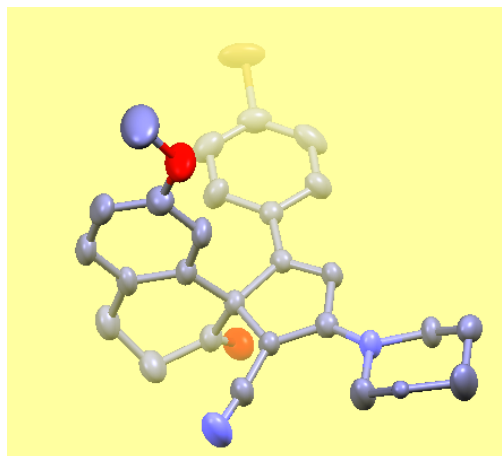

### Perspective view of **17a** Showing absolute configuration:

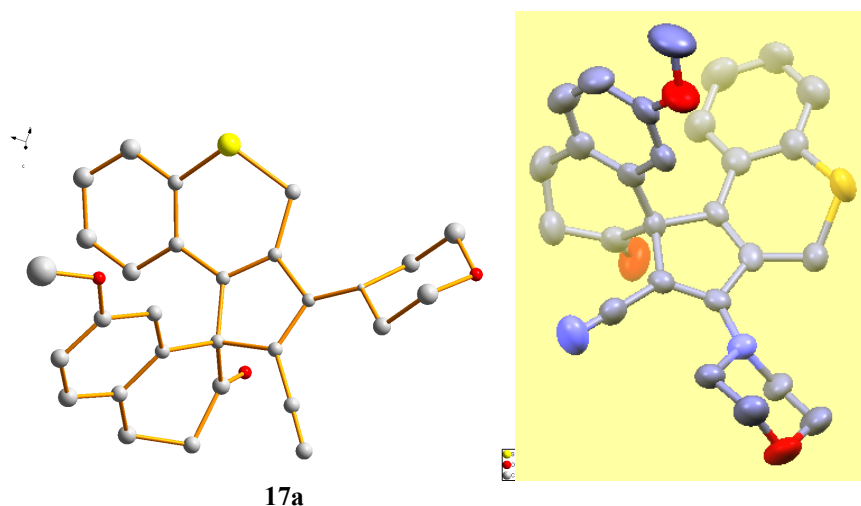

### XYZ Coordinates for dimer of **11d**

Counterpoise: corrected energy = -7750.365223271178

| Center Number | Atomic Number | Atomic Type | Coordinates (Angstroms) |           |           |
|---------------|---------------|-------------|-------------------------|-----------|-----------|
|               |               |             | X                       | Y         | Z         |
| 1             | 8             | 0           | -4.380078               | 0.322314  | 2.654824  |
| 2             | 7             | 0           | -8.680660               | 1.449877  | 0.414840  |
| 3             | 6             | 0           | -5.534611               | -0.490406 | 0.710929  |
| 4             | 6             | 0           | -7.443283               | 0.930161  | 0.496376  |
| 5             | 6             | 0           | -5.290949               | -1.686359 | -0.222109 |
| 6             | 6             | 0           | -5.173863               | 0.834737  | 0.060790  |
| 7             | 6             | 0           | -4.809479               | -0.638486 | 2.057514  |
| 8             | 6             | 0           | -5.483547               | -2.622867 | -2.441345 |
| 9             | 6             | 0           | -4.603097               | -2.832613 | 0.197093  |
| 10            | 6             | 0           | -6.262343               | 1.599793  | -0.037632 |
| 11            | 1             | 0           | -6.268007               | 2.455064  | -0.402075 |
| 12            | 6             | 0           | -7.019701               | -0.294633 | 1.000789  |
| 13            | 6             | 0           | -3.821801               | 1.191166  | -0.383453 |
| 14            | 6             | 0           | -5.749482               | -1.613088 | -1.530890 |
| 15            | 1             | 0           | -6.241003               | -0.871591 | -1.801396 |
| 16            | 6             | 0           | -11.089578              | 1.036401  | 0.155851  |
| 17            | 1             | 0           | -11.846189              | 0.590563  | 0.566545  |
| 18            | 1             | 0           | -10.993370              | 0.695781  | -0.747437 |
| 19            | 6             | 0           | -4.729349               | -2.043357 | 2.590435  |
| 20            | 1             | 0           | -4.221300               | -2.045872 | 3.417139  |
| 21            | 1             | 0           | -5.622975               | -2.365789 | 2.785347  |
| 22            | 6             | 0           | -10.145910              | 3.207213  | -0.504458 |
| 23            | 1             | 0           | -10.050446              | 2.915827  | -1.424612 |
| 24            | 1             | 0           | -10.288567              | 4.166707  | -0.507639 |
| 25            | 6             | 0           | -4.075013               | -2.958800 | 1.601420  |
| 26            | 1             | 0           | -4.195106               | -3.874247 | 1.898049  |
| 27            | 1             | 0           | -3.121684               | -2.775995 | 1.592162  |
| 28            | 7             | 0           | -8.256427               | -2.131932 | 2.244133  |
| 29            | 6             | 0           | -3.529050               | 2.509394  | -0.693821 |
| 30            | 1             | 0           | -4.188229               | 3.158727  | -0.595674 |
| 31            | 6             | 0           | -2.812594               | 0.258444  | -0.519264 |
| 32            | 1             | 0           | -2.979312               | -0.629368 | -0.295240 |
| 33            | 6             | 0           | -4.790351               | -3.742053 | -2.031748 |
| 34            | 1             | 0           | -4.604279               | -4.424409 | -2.636241 |
| 35            | 6             | 0           | -4.378745               | -3.843613 | -0.731040 |
| 36            | 1             | 0           | -3.933826               | -4.613882 | -0.458565 |
| 37            | 6             | 0           | -8.889276               | 2.896967  | 0.245522  |
| 38            | 1             | 0           | -8.132620               | 3.273330  | -0.232020 |

|     |    |   |            |           |           |
|-----|----|---|------------|-----------|-----------|
| 39  | 1  | 0 | -8.927635  | 3.317076  | 1.118900  |
| 40  | 6  | 0 | -9.844154  | 0.737335  | 0.939522  |
| 41  | 1  | 0 | -9.982276  | 0.990615  | 1.865827  |
| 42  | 1  | 0 | -9.672338  | -0.216165 | 0.913758  |
| 43  | 6  | 0 | -7.746142  | -1.281752 | 1.680184  |
| 44  | 6  | 0 | -11.342583 | 2.529939  | 0.110639  |
| 45  | 1  | 0 | -12.135568 | 2.714351  | -0.418068 |
| 46  | 1  | 0 | -11.489805 | 2.867896  | 1.007654  |
| 47  | 6  | 0 | -1.573710  | 0.611367  | -0.976866 |
| 48  | 1  | 0 | -0.909686  | -0.032428 | -1.068920 |
| 49  | 6  | 0 | -2.274148  | 2.877332  | -1.146048 |
| 50  | 1  | 0 | -2.082436  | 3.765036  | -1.344931 |
| 51  | 6  | 0 | -1.316847  | 1.904635  | -1.296427 |
| 52  | 35 | 0 | 0.396711   | 2.420766  | -1.905714 |
| 53  | 8  | 0 | -5.947805  | -2.419985 | -3.709696 |
| 54  | 6  | 0 | -5.648175  | -3.390866 | -4.696046 |
| 55  | 1  | 0 | -6.032731  | -3.124701 | -5.534387 |
| 56  | 1  | 0 | -6.012970  | -4.238623 | -4.432549 |
| 57  | 1  | 0 | -4.695301  | -3.467590 | -4.790166 |
| 58  | 35 | 0 | -0.396711  | -2.420766 | 1.905714  |
| 59  | 1  | 0 | 3.121684   | 2.775994  | -1.592161 |
| 60  | 8  | 0 | 4.380079   | -0.322313 | -2.654824 |
| 61  | 7  | 0 | 8.680659   | -1.449876 | -0.414841 |
| 62  | 6  | 0 | 5.534612   | 0.490406  | -0.710930 |
| 63  | 6  | 0 | 7.443283   | -0.930162 | -0.496375 |
| 64  | 6  | 0 | 5.290949   | 1.686358  | 0.222109  |
| 65  | 6  | 0 | 5.173863   | -0.834738 | -0.060790 |
| 66  | 6  | 0 | 4.809480   | 0.638486  | -2.057515 |
| 67  | 6  | 0 | 5.483548   | 2.622867  | 2.441346  |
| 68  | 6  | 0 | 4.603097   | 2.832613  | -0.197093 |
| 69  | 6  | 0 | 6.262342   | -1.599793 | 0.037631  |
| 70  | 1  | 0 | 6.268007   | -2.455065 | 0.402075  |
| 71  | 6  | 0 | 7.019701   | 0.294633  | -1.000789 |
| 72  | 6  | 0 | 3.821802   | -1.191166 | 0.383453  |
| 73  | 6  | 0 | 5.749482   | 1.613089  | 1.530890  |
| 74  | 1  | 0 | 6.241004   | 0.871591  | 1.801396  |
| 75  | 6  | 0 | 11.089578  | -1.036401 | -0.155850 |
| 76  | 1  | 0 | 11.846188  | -0.590563 | -0.566545 |
| 77  | 1  | 0 | 10.993371  | -0.695781 | 0.747437  |
| 78  | 6  | 0 | 4.729349   | 2.043357  | -2.590435 |
| 79  | 1  | 0 | 4.221301   | 2.045872  | -3.417140 |
| 80  | 1  | 0 | 5.622975   | 2.365789  | -2.785348 |
| 81  | 6  | 0 | 10.145909  | -3.207213 | 0.504457  |
| 82  | 1  | 0 | 10.050446  | -2.915826 | 1.424612  |
| 83  | 1  | 0 | 10.288568  | -4.166707 | 0.507639  |
| 84  | 6  | 0 | 4.075013   | 2.958801  | -1.601420 |
| 85  | 1  | 0 | 4.195106   | 3.874247  | -1.898049 |
| 86  | 7  | 0 | 8.256427   | 2.131932  | -2.244133 |
| 87  | 6  | 0 | 3.529051   | -2.509394 | 0.693821  |
| 88  | 1  | 0 | 4.188229   | -3.158727 | 0.595674  |
| 89  | 6  | 0 | 2.812594   | -0.258444 | 0.519265  |
| 90  | 1  | 0 | 2.979311   | 0.629368  | 0.295240  |
| 91  | 6  | 0 | 4.790351   | 3.742054  | 2.031748  |
| 92  | 1  | 0 | 4.604279   | 4.424409  | 2.636241  |
| 93  | 6  | 0 | 4.378746   | 3.843613  | 0.731041  |
| 94  | 1  | 0 | 3.933825   | 4.613883  | 0.458564  |
| 95  | 6  | 0 | 8.889275   | -2.896968 | -0.245522 |
| 96  | 1  | 0 | 8.132620   | -3.273330 | 0.232020  |
| 97  | 1  | 0 | 8.927635   | -3.317075 | -1.118899 |
| 98  | 6  | 0 | 9.844154   | -0.737335 | -0.939522 |
| 99  | 1  | 0 | 9.982277   | -0.990615 | -1.865827 |
| 100 | 1  | 0 | 9.672338   | 0.216165  | -0.913757 |

|     |   |   |           |           |           |
|-----|---|---|-----------|-----------|-----------|
| 101 | 6 | 0 | 7.746142  | 1.281752  | -1.680185 |
| 102 | 6 | 0 | 11.342583 | -2.529939 | -0.110639 |
| 103 | 1 | 0 | 12.135569 | -2.714351 | 0.418068  |
| 104 | 1 | 0 | 11.489805 | -2.867896 | -1.007653 |
| 105 | 6 | 0 | 1.573710  | -0.611366 | 0.976866  |
| 106 | 1 | 0 | 0.909686  | 0.032429  | 1.068920  |
| 107 | 6 | 0 | 2.274148  | -2.877331 | 1.146048  |
| 108 | 1 | 0 | 2.082436  | -3.765036 | 1.344932  |
| 109 | 6 | 0 | 1.316847  | -1.904634 | 1.296427  |
| 110 | 8 | 0 | 5.947805  | 2.419985  | 3.709697  |
| 111 | 6 | 0 | 5.648175  | 3.390866  | 4.696046  |
| 112 | 1 | 0 | 6.032731  | 3.124702  | 5.534387  |
| 113 | 1 | 0 | 6.012970  | 4.238623  | 4.432548  |
| 114 | 1 | 0 | 4.695301  | 3.467590  | 4.790166  |

-----

### Optimized XYZ coordinates for monomer of **11d**

Energy = -3875.18397073

| Center<br>Number | Atomic<br>Number | Atomic<br>Type | Coordinates (Angstroms) |           |           |
|------------------|------------------|----------------|-------------------------|-----------|-----------|
|                  |                  |                | X                       | Y         | Z         |
| 1                | 8                | 0              | 0.024009                | -0.468193 | -3.109164 |
| 2                | 7                | 0              | -3.503178               | -1.673681 | 0.190788  |
| 3                | 6                | 0              | -0.730267               | 0.465416  | -1.027907 |
| 4                | 6                | 0              | -2.379088               | -1.069438 | -0.232494 |
| 5                | 6                | 0              | -0.404608               | 1.775305  | -0.294168 |
| 6                | 6                | 0              | -0.093087               | -0.744148 | -0.364747 |
| 7                | 6                | 0              | -0.354265               | 0.516894  | -2.516869 |
| 8                | 6                | 0              | -0.177738               | 2.939639  | 1.811065  |
| 9                | 6                | 0              | 0.044602                | 2.917727  | -0.969335 |
| 10               | 6                | 0              | -1.043599               | -1.577538 | 0.061603  |
| 11               | 1                | 0              | -0.875801               | -2.383534 | 0.493521  |
| 12               | 6                | 0              | -2.213388               | 0.119966  | -0.933804 |
| 13               | 6                | 0              | 1.354571                | -0.938618 | -0.227149 |
| 14               | 6                | 0              | -0.539196               | 1.814907  | 1.087442  |
| 15               | 1                | 0              | -0.874984               | 1.072094  | 1.534722  |
| 16               | 6                | 0              | -5.817363               | -1.427188 | 0.981177  |
| 17               | 1                | 0              | -6.690537               | -1.092799 | 0.724950  |
| 18               | 1                | 0              | -5.551857               | -0.979497 | 1.799887  |
| 19               | 6                | 0              | -0.546233               | 1.853954  | -3.179823 |
| 20               | 1                | 0              | -0.245332               | 1.803042  | -4.100923 |
| 21               | 1                | 0              | -1.489386               | 2.079721  | -3.183328 |
| 22               | 6                | 0              | -4.525516               | -3.426501 | 1.591769  |
| 23               | 1                | 0              | -4.251702               | -3.025708 | 2.431467  |
| 24               | 1                | 0              | -4.562563               | -4.387721 | 1.716956  |
| 25               | 6                | 0              | 0.218950                | 2.925220  | -2.464821 |
| 26               | 1                | 0              | -0.061188               | 3.788473  | -2.806539 |
| 27               | 1                | 0              | 1.162526                | 2.821389  | -2.667856 |
| 28               | 7                | 0              | -3.888187               | 1.699310  | -2.007016 |
| 29               | 6                | 0              | 1.846999                | -2.185392 | 0.123316  |
| 30               | 1                | 0              | 1.254480                | -2.892238 | 0.246090  |
| 31               | 6                | 0              | 2.264809                | 0.081109  | -0.423461 |
| 32               | 1                | 0              | 1.959168                | 0.921524  | -0.681292 |
| 33               | 6                | 0              | 0.281681                | 4.056775  | 1.146377  |
| 34               | 1                | 0              | 0.529621                | 4.816097  | 1.623452  |
| 35               | 6                | 0              | 0.369771                | 4.042356  | -0.218763 |
| 36               | 1                | 0              | 0.657012                | 4.809716  | -0.659400 |
| 37               | 6                | 0              | -3.514841               | -3.104150 | 0.537028  |
| 38               | 1                | 0              | -2.633488               | -3.362134 | 0.851487  |
| 39               | 1                | 0              | -3.709186               | -3.622538 | -0.259374 |
| 40               | 6                | 0              | -4.824124               | -1.120634 | -0.102412 |



|    |    |   |           |           |           |
|----|----|---|-----------|-----------|-----------|
| 41 | 1  | 0 | -5.144607 | -1.487798 | -0.941311 |
| 42 | 1  | 0 | -4.751574 | -0.159730 | -0.206072 |
| 43 | 6  | 0 | -3.175799 | 0.962248  | -1.506538 |
| 44 | 6  | 0 | -5.895699 | -2.921309 | 1.222377  |
| 45 | 1  | 0 | -6.521894 | -3.107167 | 1.940500  |
| 46 | 1  | 0 | -6.209394 | -3.369725 | 0.421725  |
| 47 | 6  | 0 | 3.605677  | -0.117411 | -0.246119 |
| 48 | 1  | 0 | 4.202059  | 0.583644  | -0.375437 |
| 49 | 6  | 0 | 3.203695  | -2.398113 | 0.292995  |
| 50 | 1  | 0 | 3.527717  | -3.239284 | 0.520522  |
| 51 | 6  | 0 | 4.062893  | -1.341289 | 0.119555  |
| 52 | 35 | 0 | 5.914989  | -1.646274 | 0.344558  |
| 53 | 8  | 0 | -0.313635 | 2.845834  | 3.166846  |
| 54 | 6  | 0 | 0.101964  | 3.943365  | 3.959297  |
| 55 | 1  | 0 | -0.049233 | 3.744372  | 4.886165  |
| 56 | 1  | 0 | -0.400222 | 4.723805  | 3.714510  |
| 57 | 1  | 0 | 1.037528  | 4.106157  | 3.814615  |

Optimized XYZ coordinates for **17a** (Ground State)

Energy = -1776.99180275

| Center<br>Number | Atomic<br>Number | Atomic<br>Type | Coordinates (Angstroms) |           |           |
|------------------|------------------|----------------|-------------------------|-----------|-----------|
|                  |                  |                | X                       | Y         | Z         |
| 1                | 16               | 0              | 0.420761                | 3.229684  | 1.535300  |
| 2                | 8                | 0              | -2.373641               | -1.750108 | 3.228423  |
| 3                | 8                | 0              | 5.954064                | -0.631614 | 0.655474  |
| 4                | 8                | 0              | -0.079032               | 0.406382  | -3.239462 |
| 5                | 7                | 0              | 1.397101                | -3.556485 | -1.275348 |
| 6                | 7                | 0              | 3.181190                | -0.267354 | 0.166328  |
| 7                | 6                | 0              | -0.377115               | -0.442374 | -0.985104 |
| 8                | 6                | 0              | 0.993903                | -1.086549 | -0.709265 |
| 9                | 6                | 0              | 1.862602                | -0.134242 | -0.230108 |
| 10               | 6                | 0              | 1.132929                | 1.134306  | -0.093797 |
| 11               | 6                | 0              | 1.674816                | 2.408245  | 0.479764  |
| 12               | 6                | 0              | -0.996197               | 3.112633  | 0.462350  |
| 13               | 6                | 0              | -1.987231               | 4.086809  | 0.583328  |
| 14               | 6                | 0              | -3.152254               | 4.005569  | -0.172608 |
| 15               | 6                | 0              | -3.326270               | 2.953278  | -1.068443 |
| 16               | 6                | 0              | -2.343874               | 1.979132  | -1.188834 |
| 17               | 6                | 0              | -1.165828               | 2.022780  | -0.426515 |
| 18               | 6                | 0              | -0.149596               | 0.979979  | -0.501382 |
| 19               | 6                | 0              | -0.524333               | -0.474545 | -2.546705 |
| 20               | 6                | 0              | -1.246108               | -1.680000 | -3.101168 |
| 21               | 6                | 0              | -2.632418               | -1.812255 | -2.453543 |
| 22               | 6                | 0              | -2.559237               | -1.809479 | -0.942695 |
| 23               | 6                | 0              | -3.547267               | -2.451625 | -0.193923 |
| 24               | 6                | 0              | -3.537904               | -2.460316 | 1.196337  |
| 25               | 6                | 0              | -2.501378               | -1.809420 | 1.872278  |
| 26               | 6                | 0              | -1.503580               | -1.167860 | 1.139607  |
| 27               | 6                | 0              | -1.521699               | -1.159736 | -0.253702 |
| 28               | 6                | 0              | 3.725257                | -1.601123 | 0.453863  |
| 29               | 6                | 0              | 4.983852                | -1.445350 | 1.303168  |
| 30               | 6                | 0              | 5.439881                | 0.664760  | 0.392430  |
| 31               | 6                | 0              | 4.188085                | 0.597784  | -0.476225 |
| 32               | 6                | 0              | 1.245003                | -2.437932 | -1.006570 |
| 33               | 6                | 0              | -3.358248               | -2.387437 | 4.029446  |
| 34               | 1                | 0              | 2.515556                | 2.211975  | 1.145256  |
| 35               | 1                | 0              | 1.998471                | 3.103927  | -0.300998 |
| 36               | 1                | 0              | -1.838238               | 4.915554  | 1.265871  |
| 37               | 1                | 0              | -3.913280               | 4.771362  | -0.071126 |
| 38               | 1                | 0              | -4.222887               | 2.892201  | -1.673813 |
| 39               | 1                | 0              | -2.485877               | 1.175626  | -1.898260 |
| 40               | 1                | 0              | -0.656118               | -2.574974 | -2.876354 |
| 41               | 1                | 0              | -1.307765               | -1.565972 | -4.184361 |
| 42               | 1                | 0              | -3.110300               | -2.732646 | -2.799796 |

|    |   |   |           |           |           |
|----|---|---|-----------|-----------|-----------|
| 43 | 1 | 0 | -3.272026 | -0.990142 | -2.801272 |
| 44 | 1 | 0 | -4.349363 | -2.965064 | -0.714729 |
| 45 | 1 | 0 | -4.323792 | -2.974855 | 1.732251  |
| 46 | 1 | 0 | -0.709685 | -0.672493 | 1.685688  |
| 47 | 1 | 0 | 2.980384  | -2.179656 | 1.001608  |
| 48 | 1 | 0 | 3.970428  | -2.142983 | -0.468967 |
| 49 | 1 | 0 | 4.719991  | -1.011232 | 2.279099  |
| 50 | 1 | 0 | 5.452168  | -2.417368 | 1.464323  |
| 51 | 1 | 0 | 5.208924  | 1.178958  | 1.338136  |
| 52 | 1 | 0 | 6.229385  | 1.214809  | -0.122616 |
| 53 | 1 | 0 | 4.449685  | 0.186761  | -1.462585 |
| 54 | 1 | 0 | 3.783514  | 1.596869  | -0.634140 |
| 55 | 1 | 0 | -4.352646 | -1.957835 | 3.863318  |
| 56 | 1 | 0 | -3.392493 | -3.466725 | 3.842728  |
| 57 | 1 | 0 | -3.060130 | -2.211627 | 5.061701  |

**Optimized XYZ coordinates for 17a (Transition State)**  
**Energy = -1776.98734748**

| Center Number | Atomic Number | Atomic Type | Coordinates (Angstroms) |           |           |
|---------------|---------------|-------------|-------------------------|-----------|-----------|
|               |               |             | X                       | Y         | Z         |
| 1             | 16            | 0           | 0.358903                | 3.437059  | 1.076892  |
| 2             | 8             | 0           | -3.132007               | -0.744661 | 3.055672  |
| 3             | 8             | 0           | 5.949058                | -0.431255 | 0.990702  |
| 4             | 8             | 0           | -0.156944               | 0.047707  | -3.229237 |
| 5             | 7             | 0           | 1.523984                | -3.675433 | -0.679331 |
| 6             | 7             | 0           | 3.193525                | -0.182688 | 0.351420  |
| 7             | 6             | 0           | -0.313473               | -0.585970 | -0.898078 |
| 8             | 6             | 0           | 1.057995                | -1.159683 | -0.490266 |
| 9             | 6             | 0           | 1.891221                | -0.132158 | -0.114279 |
| 10            | 6             | 0           | 1.140530                | 1.128364  | -0.190383 |
| 11            | 6             | 0           | 1.652356                | 2.481875  | 0.197737  |
| 12            | 6             | 0           | -1.023146               | 3.136001  | -0.006076 |
| 13            | 6             | 0           | -2.028399               | 4.101974  | -0.056985 |
| 14            | 6             | 0           | -3.174659               | 3.887089  | -0.814886 |
| 15            | 6             | 0           | -3.316583               | 2.704621  | -1.537454 |
| 16            | 6             | 0           | -2.319863               | 1.739427  | -1.488032 |
| 17            | 6             | 0           | -1.156283               | 1.920772  | -0.722256 |
| 18            | 6             | 0           | -0.125655               | 0.893869  | -0.612289 |
| 19            | 6             | 0           | -0.424986               | -0.824322 | -2.438351 |
| 20            | 6             | 0           | -0.820323               | -2.211577 | -2.899018 |
| 21            | 6             | 0           | -1.744824               | -3.027891 | -1.971388 |
| 22            | 6             | 0           | -2.128115               | -2.366796 | -0.662130 |
| 23            | 6             | 0           | -3.161565               | -2.931065 | 0.090096  |
| 24            | 6             | 0           | -3.540794               | -2.432536 | 1.330825  |
| 25            | 6             | 0           | -2.864590               | -1.325399 | 1.850893  |
| 26            | 6             | 0           | -1.839737               | -0.739242 | 1.109216  |
| 27            | 6             | 0           | -1.469880               | -1.243283 | -0.137957 |
| 28            | 6             | 0           | 3.736400                | -1.448766 | 0.860760  |
| 29            | 6             | 0           | 4.961029                | -1.148324 | 1.720747  |
| 30            | 6             | 0           | 5.435863                | 0.803043  | 0.514380  |
| 31            | 6             | 0           | 4.217725                | 0.588516  | -0.377813 |
| 32            | 6             | 0           | 1.342518                | -2.533684 | -0.576900 |
| 33            | 6             | 0           | -4.168268               | -1.294602 | 3.855530  |
| 34            | 1             | 0           | 2.474221                | 2.400654  | 0.909165  |
| 35            | 1             | 0           | 1.993447                | 3.054111  | -0.670780 |
| 36            | 1             | 0           | -1.905406               | 5.027315  | 0.493909  |
| 37            | 1             | 0           | -3.946857               | 4.647113  | -0.848347 |
| 38            | 1             | 0           | -4.200483               | 2.534497  | -2.140654 |
| 39            | 1             | 0           | -2.441557               | 0.830653  | -2.059754 |
| 40            | 1             | 0           | 0.124212                | -2.747621 | -3.043636 |
| 41            | 1             | 0           | -1.251856               | -2.085972 | -3.893305 |
| 42            | 1             | 0           | -1.266264               | -3.984612 | -1.743218 |
| 43            | 1             | 0           | -2.661743               | -3.271171 | -2.515597 |

|    |   |   |           |           |           |
|----|---|---|-----------|-----------|-----------|
| 44 | 1 | 0 | -3.684850 | -3.795644 | -0.306515 |
| 45 | 1 | 0 | -4.348487 | -2.905453 | 1.872627  |
| 46 | 1 | 0 | -1.341498 | 0.123626  | 1.532006  |
| 47 | 1 | 0 | 2.975393  | -1.944765 | 1.464646  |
| 48 | 1 | 0 | 4.020378  | -2.123913 | 0.042956  |
| 49 | 1 | 0 | 4.657701  | -0.573409 | 2.608345  |
| 50 | 1 | 0 | 5.429845  | -2.078117 | 2.045817  |
| 51 | 1 | 0 | 5.167620  | 1.453154  | 1.361444  |
| 52 | 1 | 0 | 6.239796  | 1.277520  | -0.051025 |
| 53 | 1 | 0 | 4.520013  | 0.036319  | -1.280210 |
| 54 | 1 | 0 | 3.811593  | 1.546734  | -0.699859 |
| 55 | 1 | 0 | -5.138885 | -1.242182 | 3.349177  |
| 56 | 1 | 0 | -3.957383 | -2.334679 | 4.129201  |
| 57 | 1 | 0 | -4.201777 | -0.686103 | 4.757748  |

**Copy of HRMS and HNMRs:  
 4-phenyl-2-(piperidin-1-yl)-9,10-dihydrophenanthrene-1-carbonitrile (10 a):**

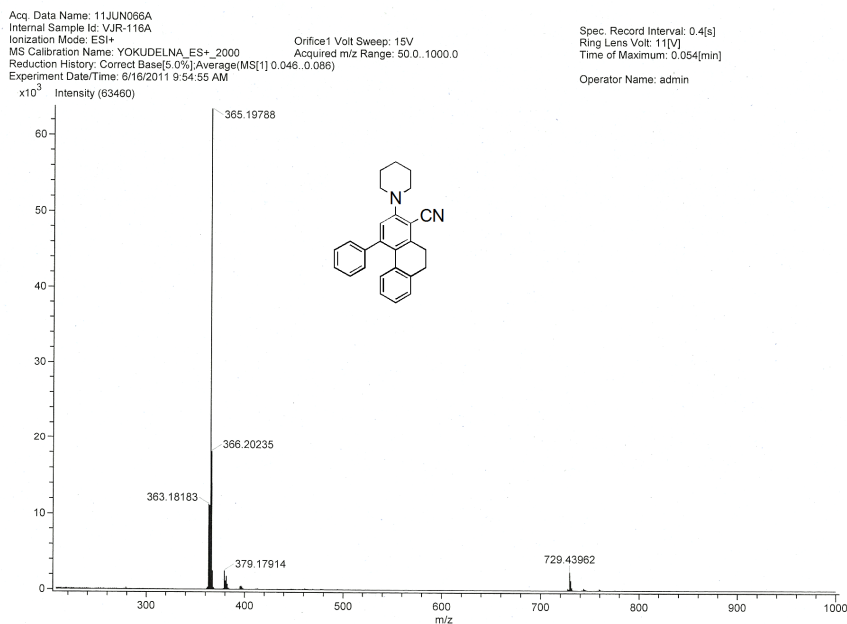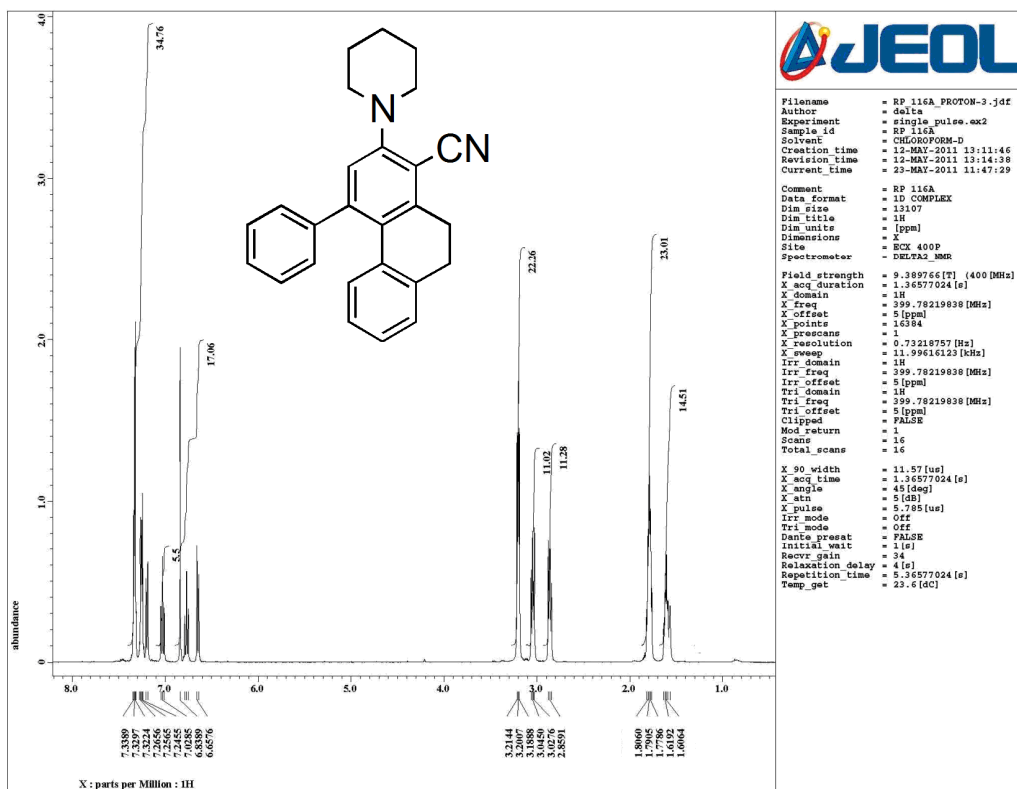

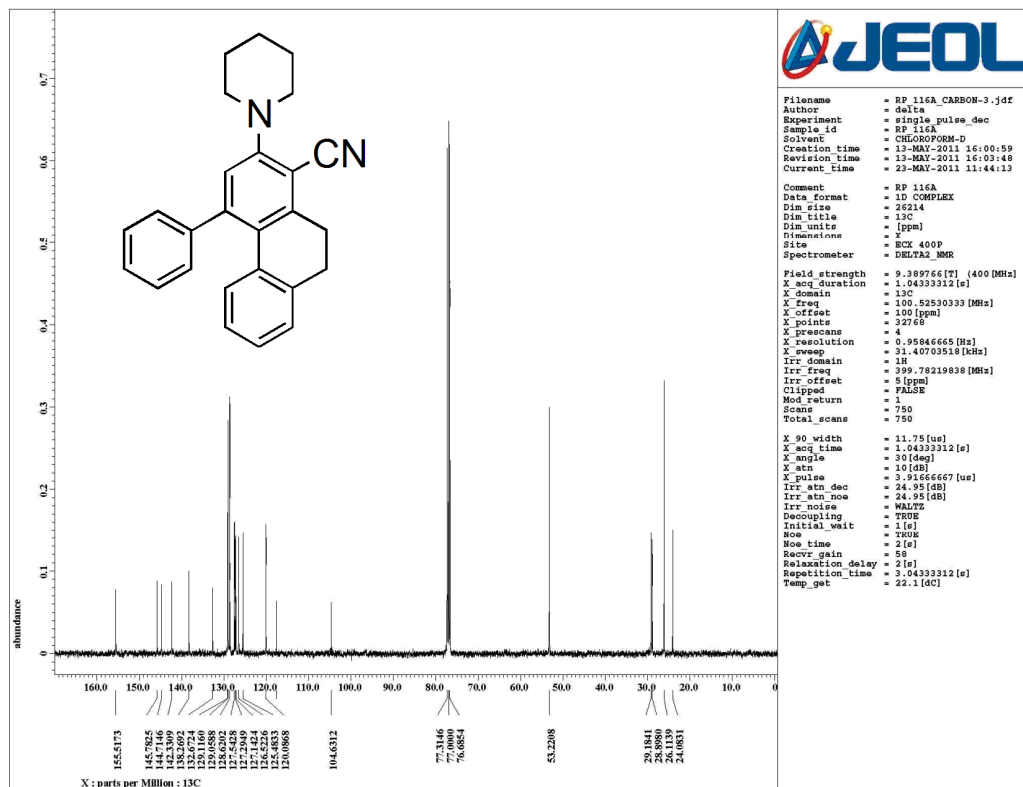

2'-oxo-5-phenyl-3-(piperidin-1-yl)-3',4'-dihydro-2'H-spiro[cyclopenta[2,4]diene-1,1'-naphthalene]-2-carbonitrile (11a):

Acq. Data Name: 11JUN064A  
 Internal Sample Id: VJR-116B  
 Ionization Mode: ESI+  
 MS Calibration Name: YOKUDELNA\_ES+\_2000  
 Reduction History: Correct Base[5.0%].Average[MS[1] 0.066..0.103]  
 Experiment Date/Time: 6/16/2011 9:52:47 AM

Spec. Record Interval: 0.4[s]  
 Ring Lens Volt: 11[V]  
 Time of Maximum: 0.074[min]

Operator Name: admin

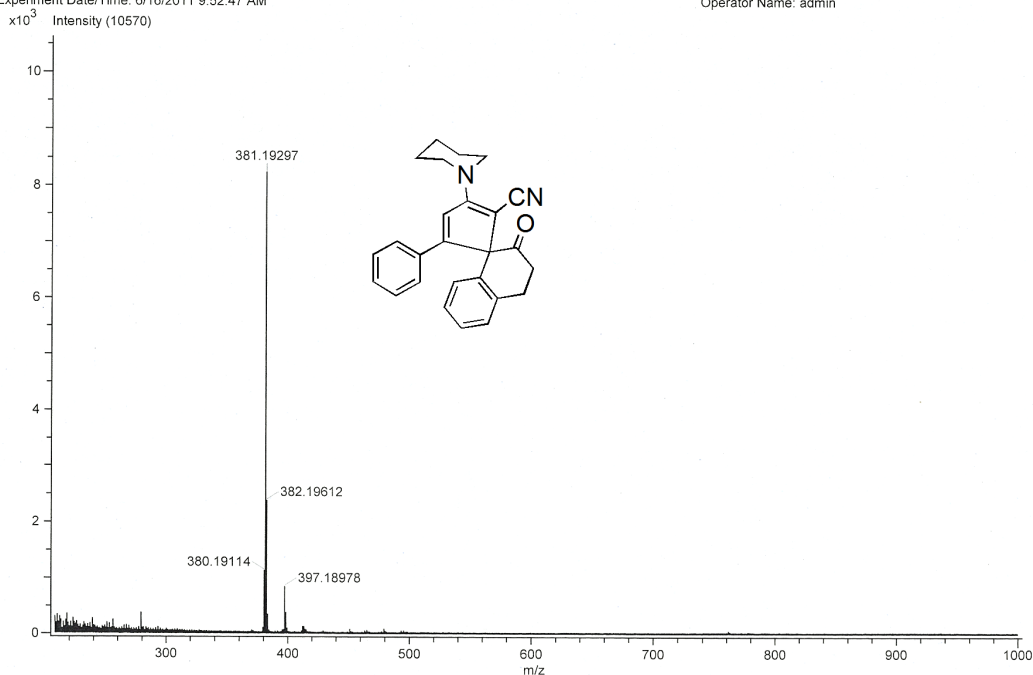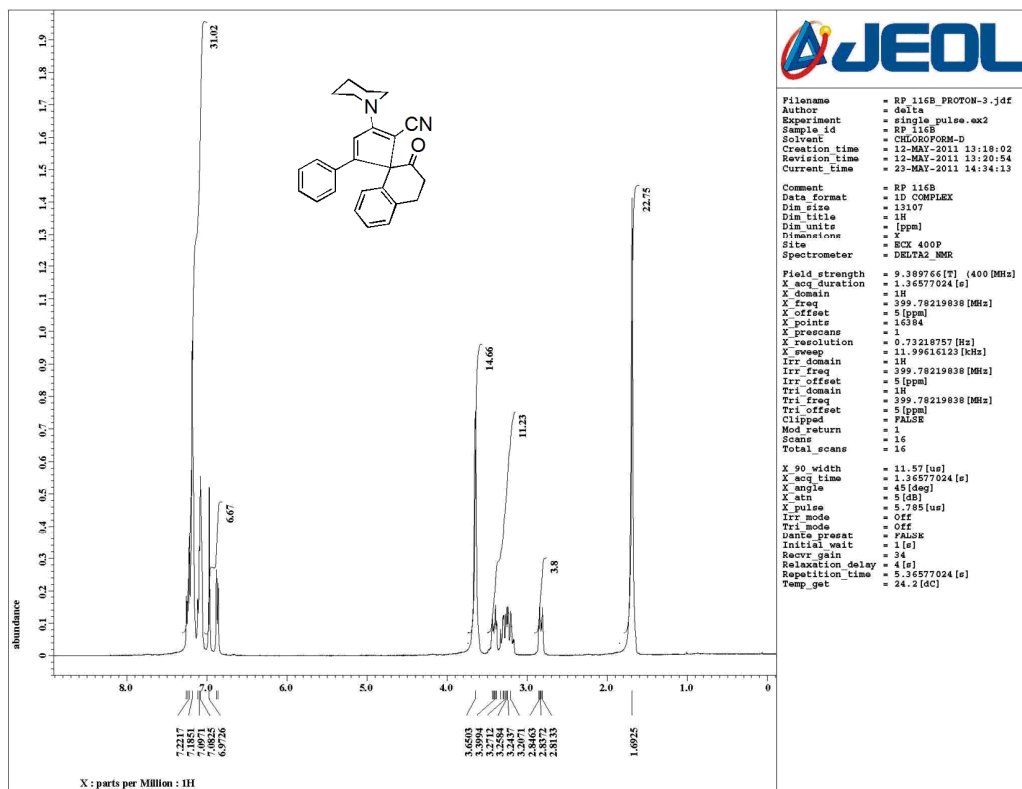

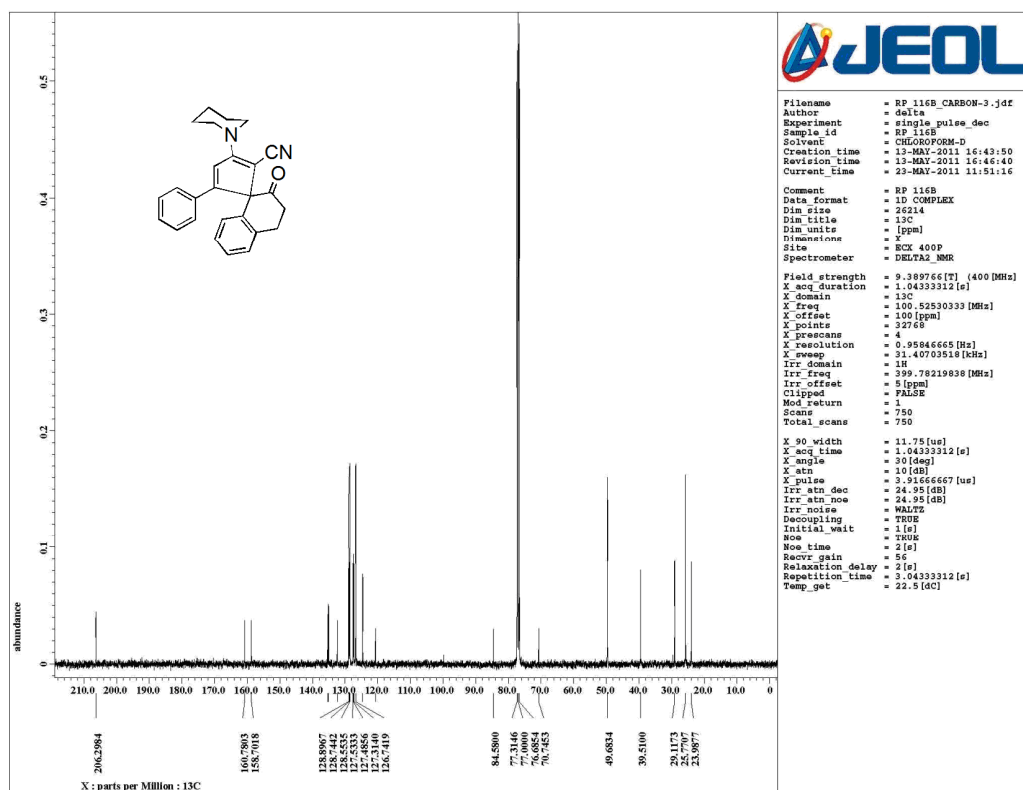

2-(piperidin-1-yl)-4-p-tolyl-9,10-dihydrophenanthrene-1-carbonitrile (10b):

Acq. Data Name: 11JUN065A  
 Internal Sample Id: VJR-120A  
 Ionization Mode: ESI+  
 MS Calibration Name: YOKUDELNA\_ES+ 2000  
 Reduction History: Correct Base[5.0%];Average(MS[1]) 0.068.0.110  
 Experiment Date/Time: 6/16/2011 9:53:57 AM

Orifice1 Volt Sweep: 15V  
 Acquired m/z Range: 50.0..1000.0

Spec. Record Interval: 0.4[s]  
 Ring Lens Volt: 11[V]  
 Time of Maximum: 0.076[min]

Operator Name: admin

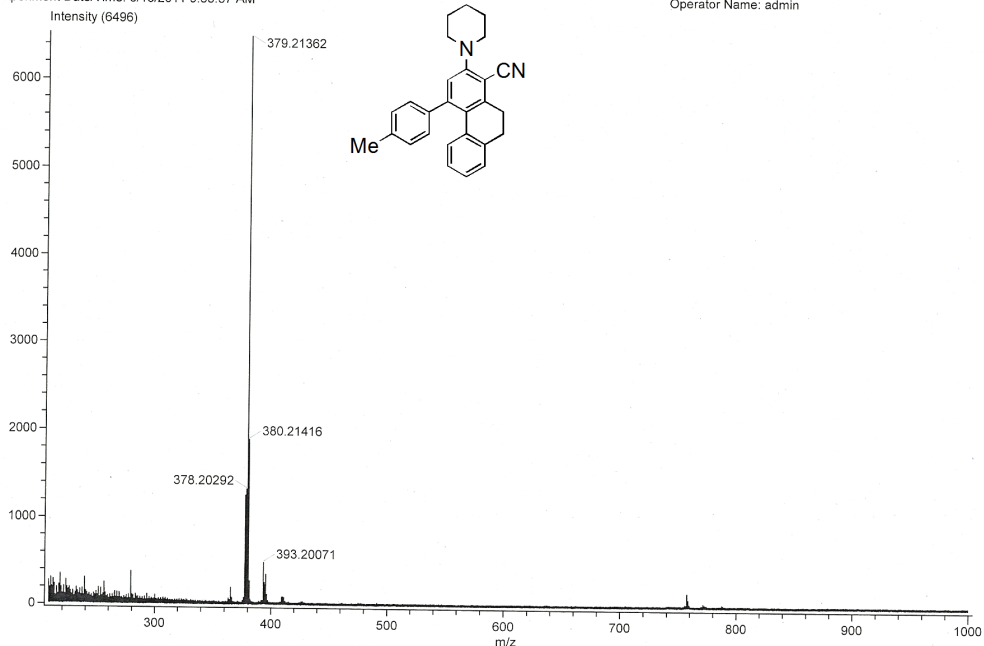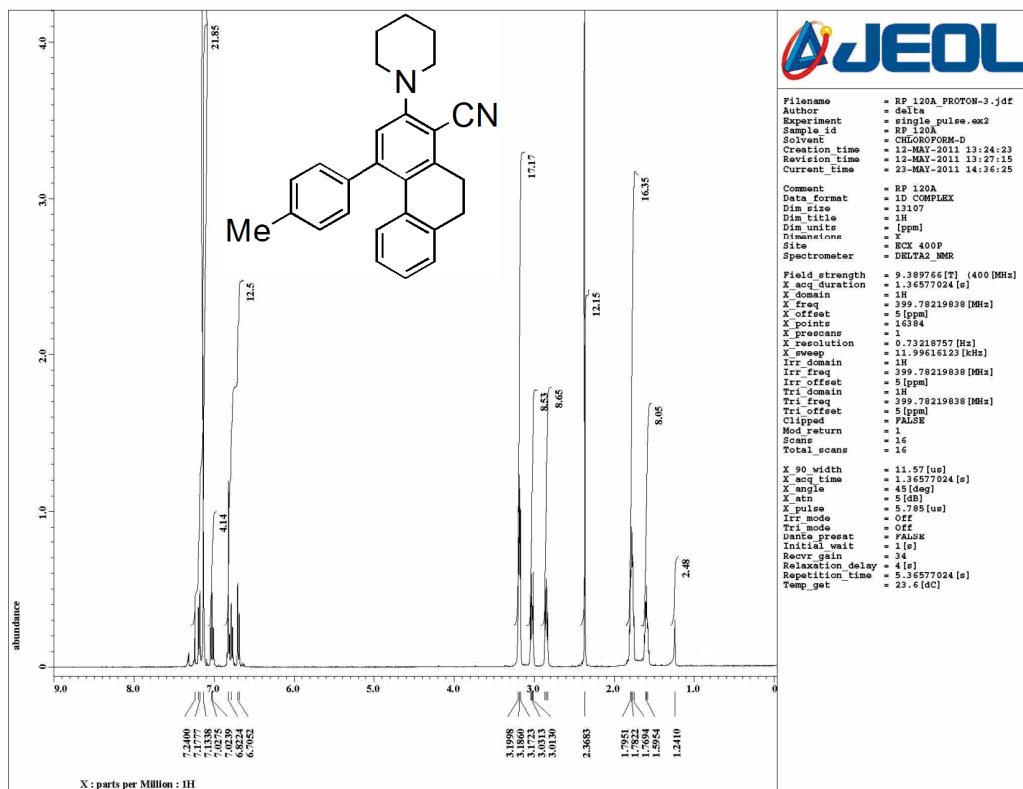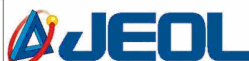

Filename = RP\_120A\_PROTON-3\_jdf  
 Author = delta  
 Experiment = single pulse.ex2  
 Sample\_id = RP\_120A  
 Solvent = CHLOROFORM-D  
 Creation time = 12-MAY-2011 13:24:23  
 Revision time = 12-MAY-2011 13:27:15  
 Current time = 23-MAY-2011 14:26:25  
 Comment = RP\_120A  
 Data format = 1D COMPLEX  
 Dim size = 13107  
 Dim title = 1H  
 Dim units = [ppm]  
 Dimension = X  
 Size = KX 400P  
 Spectrometer = DELTA2 MMR  
 Field strength = 9.389766 [T] (400 [MHz])  
 X\_acq\_duration = 1.36577024 [s]  
 X\_domain = 1H  
 X\_freq = 399.78219838 [MHz]  
 X\_offset = 5 [ppm]  
 X\_points = 16384  
 X\_prescans = 1  
 X\_resolution = 0.73218757 [Hz]  
 X\_sweep = 11.99616123 [kHz]  
 Irr\_domain = 1H  
 Irr\_freq = 399.78219838 [MHz]  
 Irr\_offset = 5 [ppm]  
 Tri\_domain = 1H  
 Tri\_freq = 399.78219838 [MHz]  
 Tri\_offset = 5 [ppm]  
 Clipped = FALSE  
 Mod\_return = 1  
 Scans = 16  
 Total\_scans = 16  
 X\_90\_width = 11.57 [us]  
 X\_acq\_time = 1.36577024 [s]  
 X\_angle = 45 [deg]  
 X\_atn = 5 [dB]  
 X\_pulse = 5.785 [us]  
 Irr\_mode = Off  
 Tri\_mode = Off  
 Device preset = FALSW  
 Initial wait = 1 [s]  
 Recv\_gain = 34  
 Relaxation delay = 4 [s]  
 Repetition\_time = 5.36577024 [s]  
 Temp\_get = 23.6 [dC]

X : parts per Million : 1H



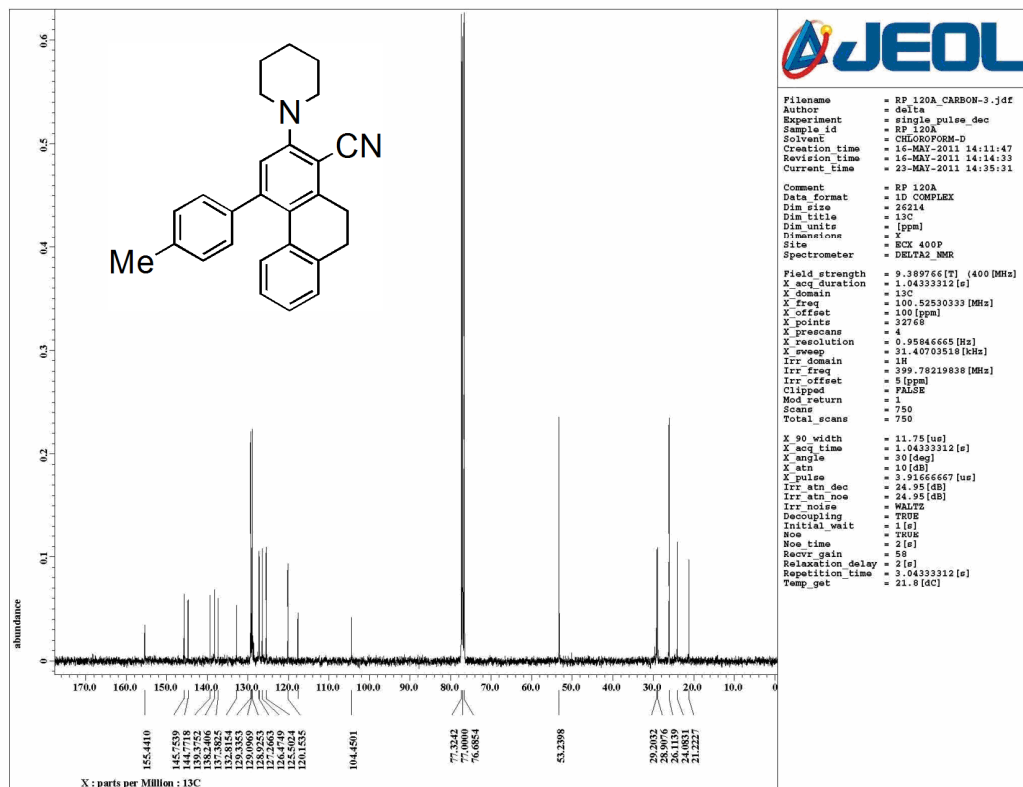

2'-oxo-3-(piperidin-1-yl)-5-p-tolyl-3',4'-dihydro-2'H-spiro[cyclopenta[2,4]diene-1,1'-naphthalene] (11b):

-2-carbonitrile

Acq. Data Name: 11JUN070A  
 Internal Sample Id: VJR-120B  
 Ionization Mode: ESI+  
 MS Calibration Name: YOKUDELNA\_ES+\_2000  
 Reduction History: Correct Base[5.0%];Average(MS[1] 0.054..0.076)  
 Experiment Date/Time: 6/16/2011 10:01:17 AM

Orifice1 Volt Sweep: 15V  
 Acquired m/z Range: 50.0..1000.0

Spec. Record Interval: 0.4[s]  
 Ring Lens Volt: 11[V]  
 Time of Maximum: 0.054[min]

Operator Name: admin

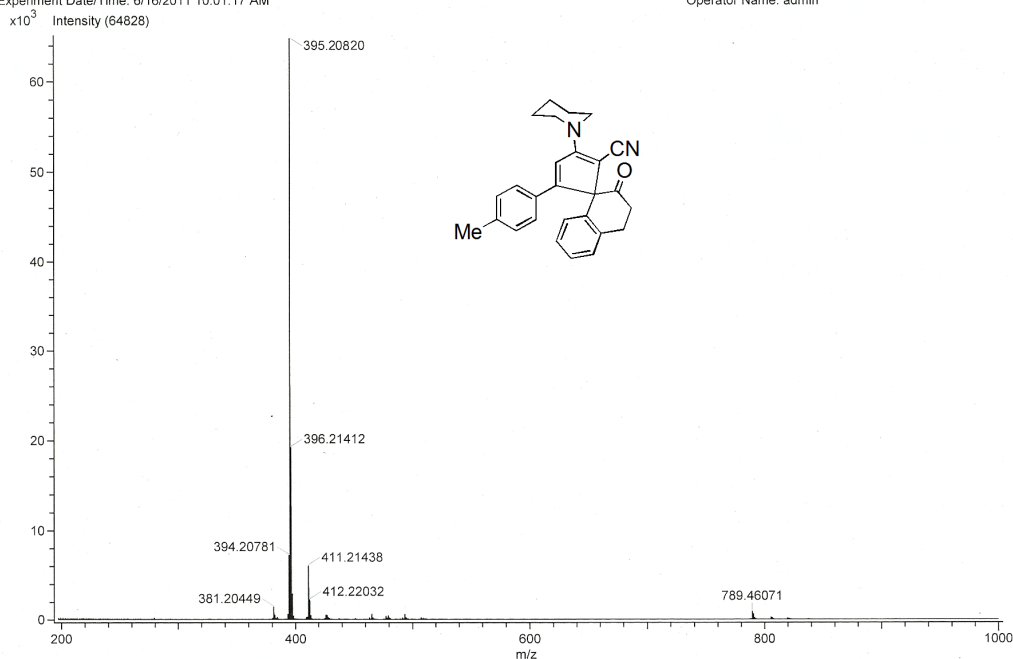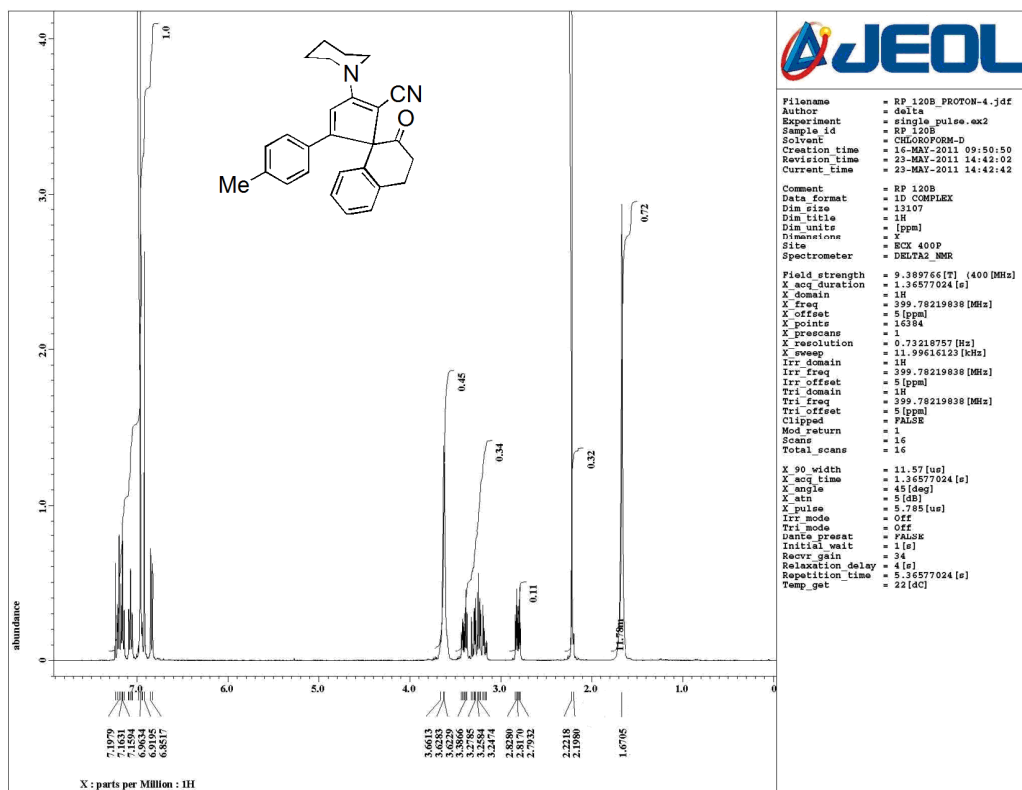

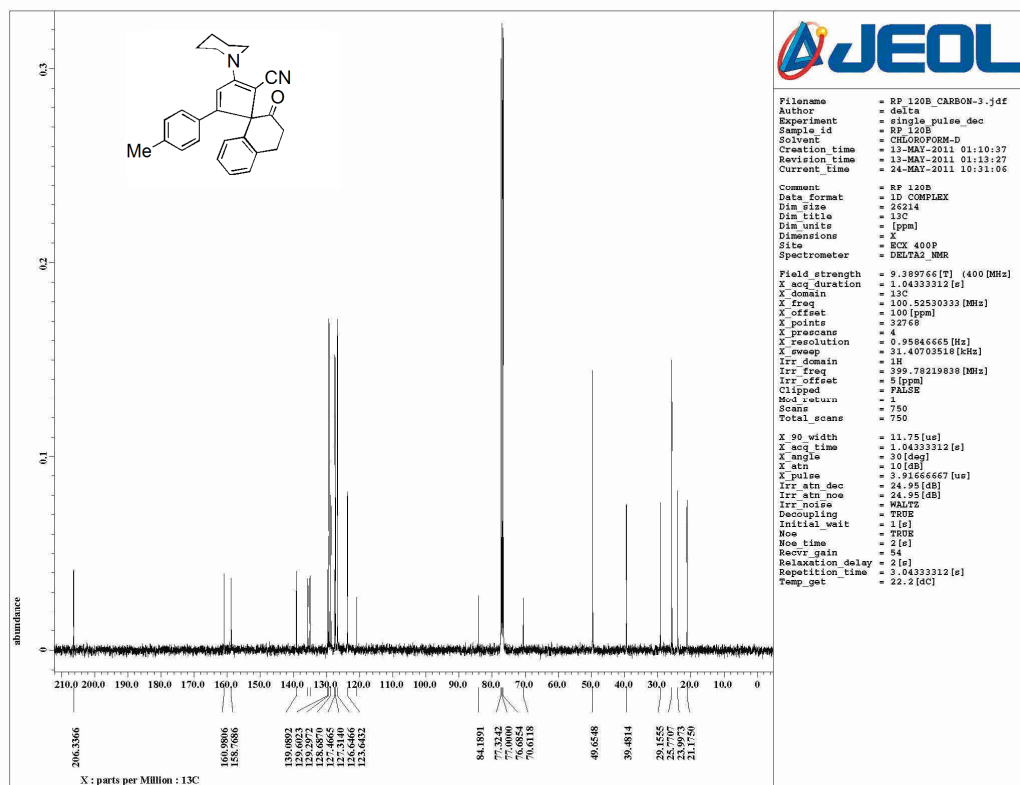

6-methoxy-2-(piperidin-1-yl)-4-p-tolyl-9,10-dihydrophenanthrene-1-carbonitrile (10c):

Acq. Data Name: 11JUN063A  
 Internal Sample Id: VJR-121A  
 Ionization Mode: ESI+  
 MS Calibration Name: YOKUDELNA\_ES+\_2000  
 Reduction History: Correct Base[5.0%];Average[MS[1] 0.066;.0.088]  
 Experiment Date/Time: 6/16/2011 9:51:47 AM

Orifice1 Volt Sweep: 15V  
 Acquired m/z Range: 50.0..1000.0

Spec. Record Interval: 0.4[s]  
 Ring Lens Volt: 11[V]  
 Time of Maximum: 0.074[min]

Operator Name: admin

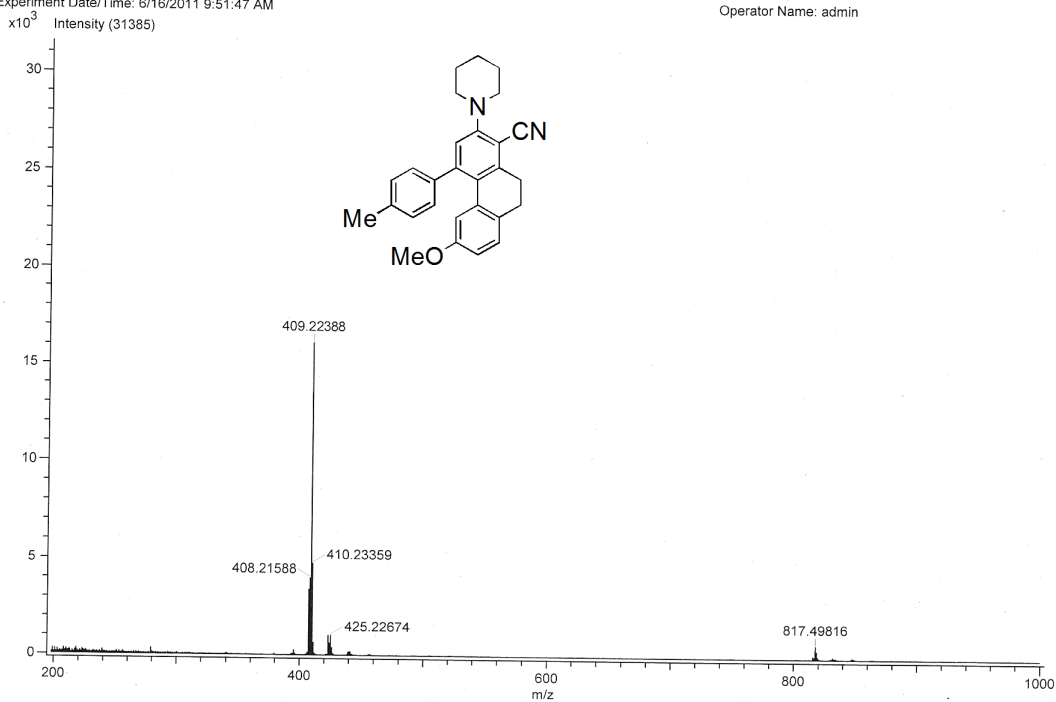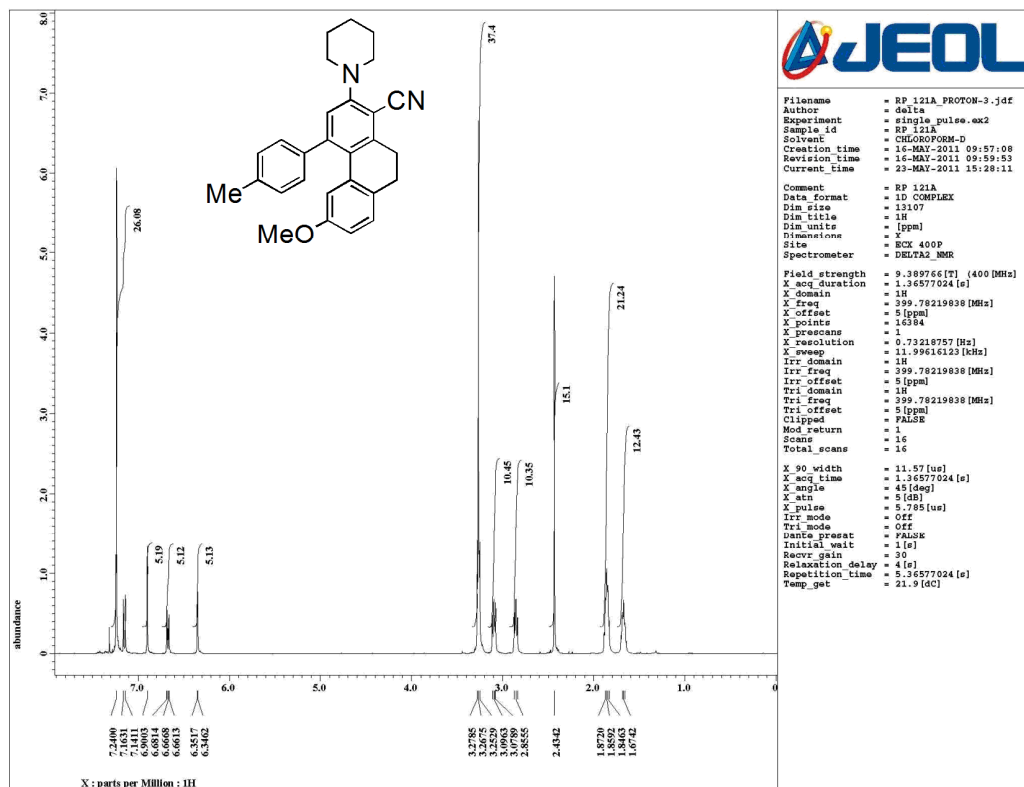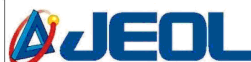

Filename = RP\_121A\_PROTON-3\_jdr  
 Author = delta  
 Experiment = single\_pulse.ex2  
 Sample\_id = RP\_121A  
 Solvent = CHLOROFORM-D  
 Creation\_time = 16-MAY-2011 09:57:08  
 Revision\_time = 16-MAY-2011 09:59:53  
 Current\_time = 23-MAY-2011 15:28:11  
 Comment = RP\_121A  
 Data\_format = 1D\_COMPLEX  
 Dim\_size = 13107  
 Dir\_title = 1H  
 Dim\_units = [ppm]  
 Dimensions = 2  
 Size = EXX\_400P  
 Spectrometer = DELTA2\_MMR  
 Field\_strength = 9.389766[T] (400 [MHz])  
 X\_acq\_duration = 1.36577024[s]  
 X\_domain = 1H  
 X\_freq = 399.78219838 [MHz]  
 X\_offset = 5 [ppm]  
 X\_points = 16384  
 X\_prescans = 1  
 X\_resolution = 0.73218757 [Hz]  
 X\_r sweep = 11.99616123 [kHz]  
 Irr\_domain = 1H  
 Irr\_freq = 399.78219838 [MHz]  
 Irr\_offset = 5 [ppm]  
 Tri\_domain = 1H  
 Tri\_freq = 399.78219838 [MHz]  
 Tri\_offset = 5 [ppm]  
 Clipped = FALSE  
 Mod\_return = 1  
 Scans = 16  
 Total\_scans = 16  
 X\_90\_width = 11.57 [us]  
 X\_acq\_time = 1.36577024[s]  
 X\_angle = 45 [deg]  
 X\_atn = 5 [dB]  
 X\_pulse = 5.785 [us]  
 Irr\_mode = Off  
 Irr\_presat = Off  
 Data\_presat = FALSE  
 Initial\_wait = 1 [s]  
 Recov\_gain = 30  
 Relaxation\_delay = 4 [s]  
 Repetition\_time = 5.36577024[s]  
 Temp\_set = 21.9 [degC]

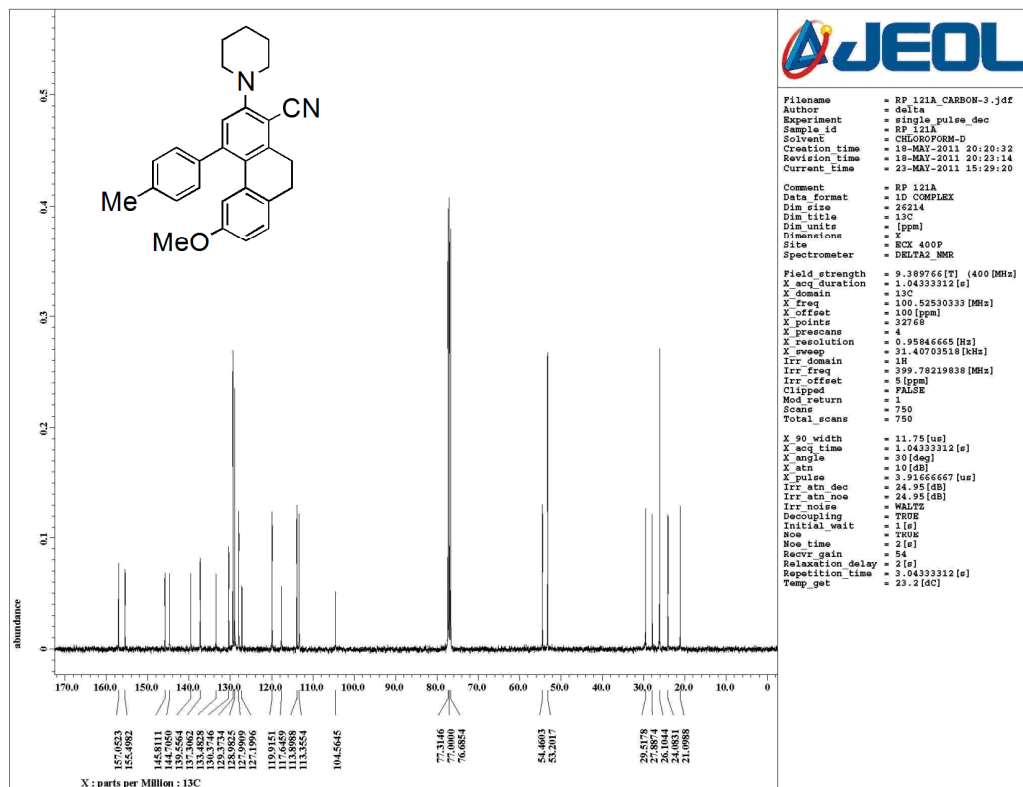

7'-methoxy-2'-oxo-3-(piperidin-1-yl)-5-p-tolyl-3',4'-dihydro-2'H-spiro[cyclopenta[2,4]diene-1,1'-naphthalene]-2-carbonitrile (11c):

Acq. Data Name: 11JUN062A  
 Internal Sample Id: VJR-121B  
 Ionization Mode: ESI+  
 MS Calibration Name: YOKUDELNA\_ES+\_2000  
 Reduction History: Correct Base[S 0%],Average(MS[1] 0.043..0.107)  
 Experiment Date/Time: 6/16/2011 9:49:09 AM

Spec. Record Interval: 0.4[s]  
 Ring Lens Volt: 11[V]  
 Time of Maximum: 0.082[min]

Operator Name: admin

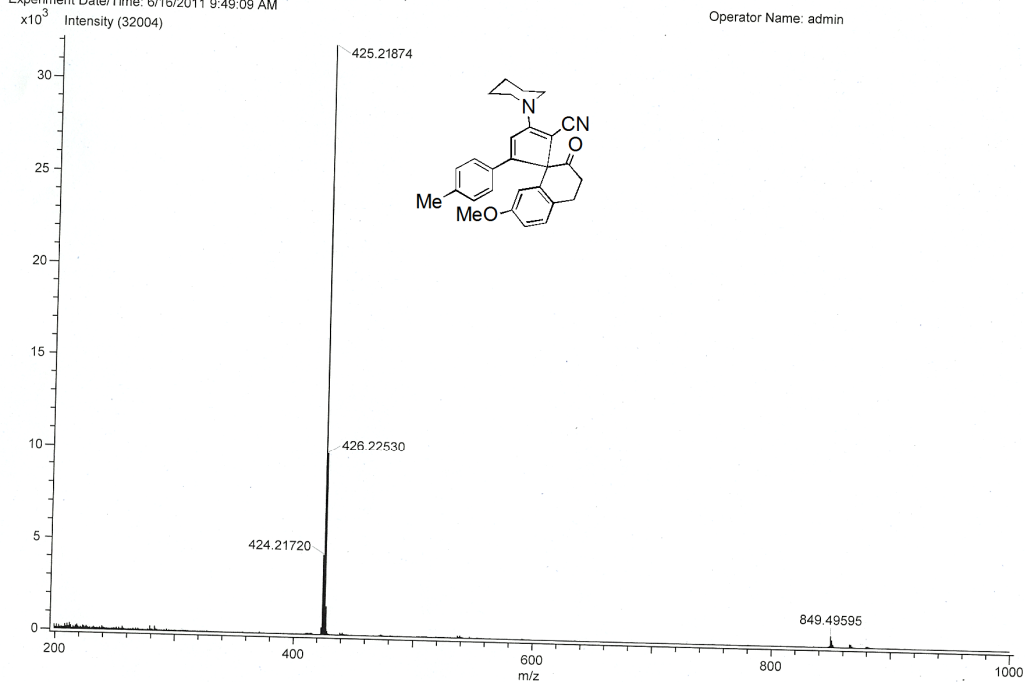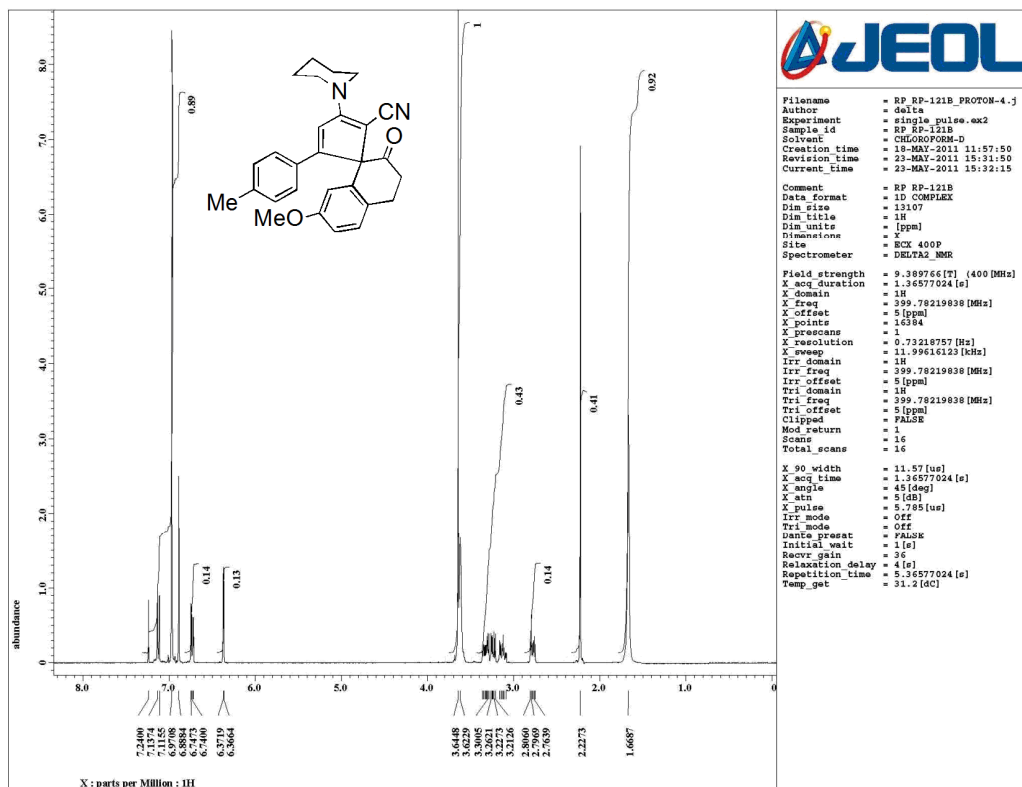

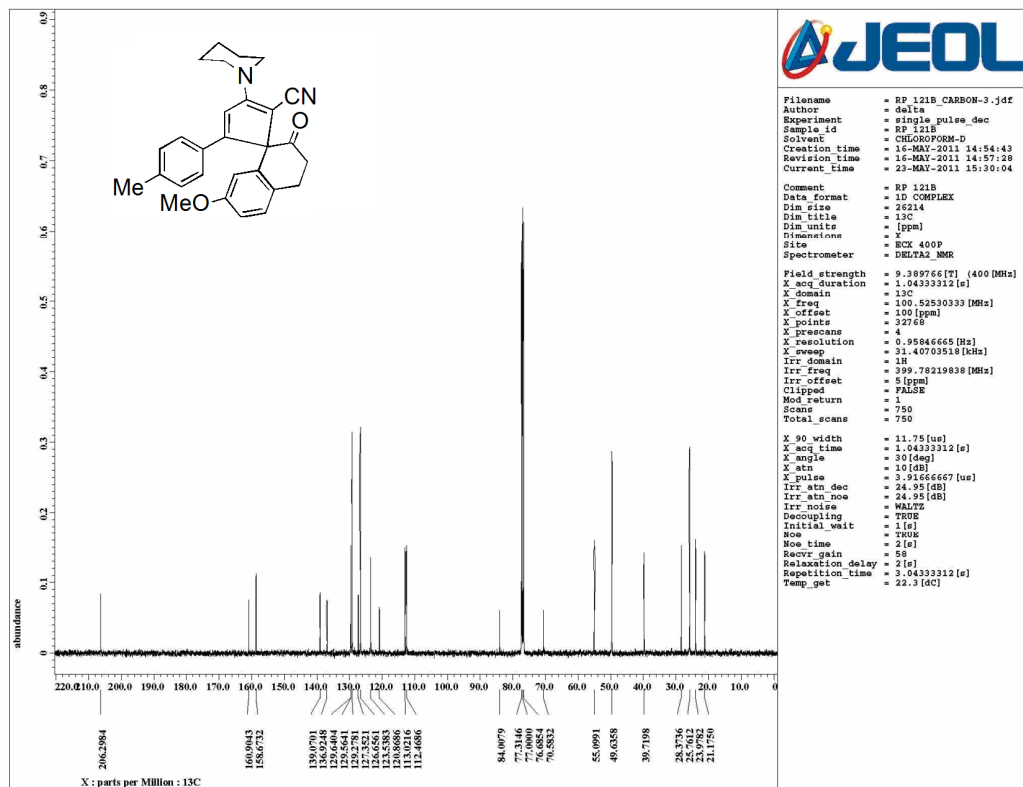

4-(4-bromophenyl)-6-methoxy-2-(piperidin-1-yl)-9,10-dihydrophenanthrene-1-carbonitrile (10d)

Acq. Data Name: 11JUN068A  
 Internal Sample Id: VJR-123A  
 Ionization Mode: ESI+  
 MS Calibration Name: YOKUDELNA\_ES+\_2000  
 Reduction History: Average(MS[1] 0.064, 0.071)  
 Experiment Date/Time: 6/16/2011 9:56:46 AM

Orifice1 Volt Sweep: 15V  
 Acquired m/z Range: 50.0..1000.0

Spec. Record Interval: 0.4[s]  
 Ring Lens Volt: 11[V]  
 Time of Maximum: 0.069[min]

Operator Name: admin

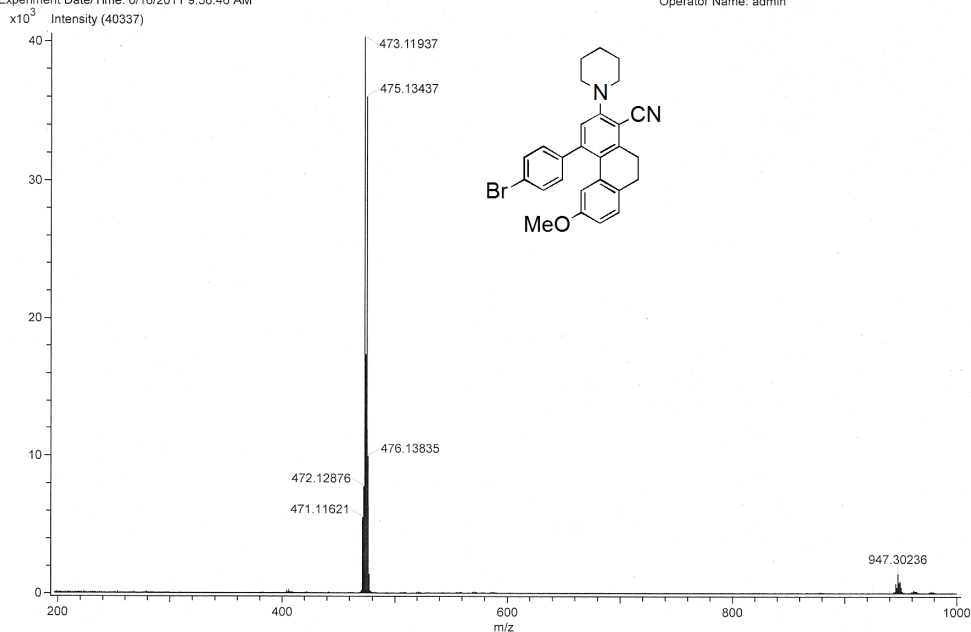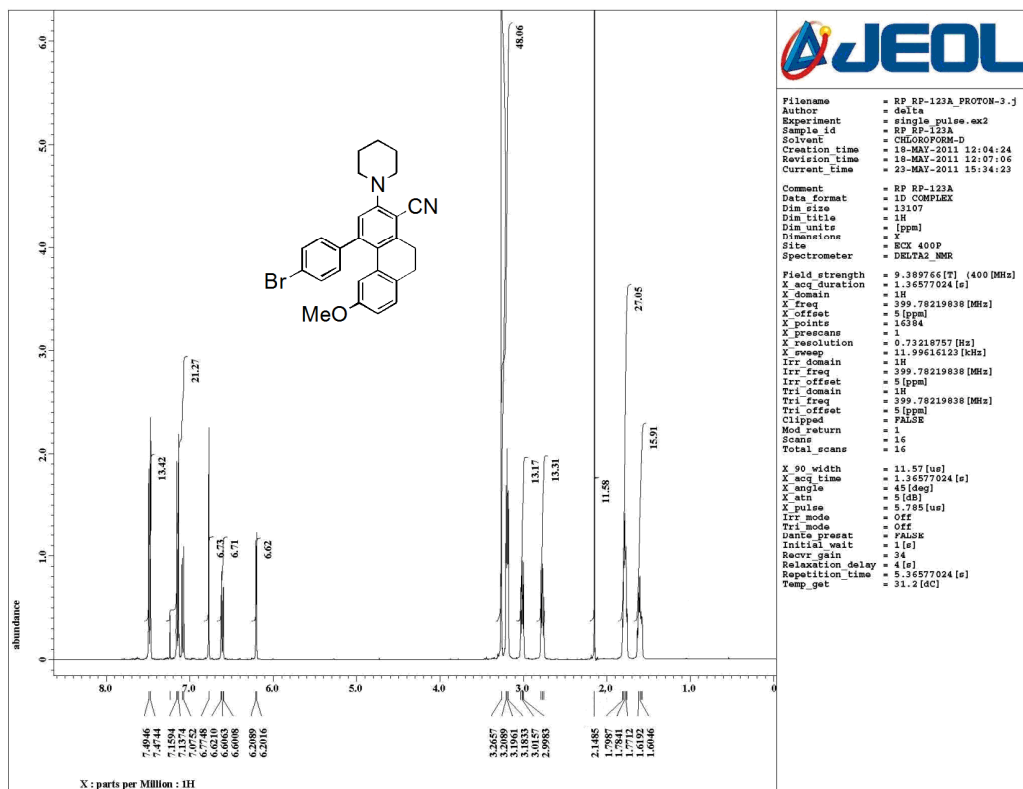



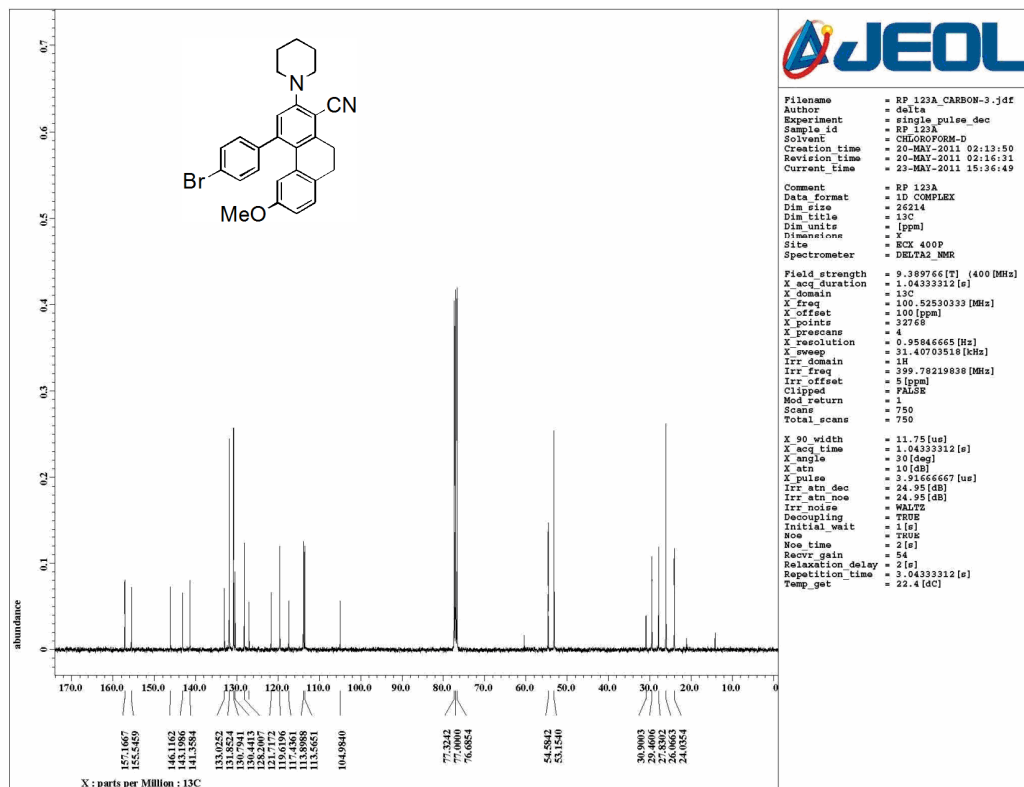

**5-(4-bromophenyl)-7'-methoxy-2'-oxo-3-(piperidin-1-yl)-3',4'-dihydro-2'H-spiro[cyclopenta[2,4]naphthalene]-2-carbonitrile (11d):**

diene-1,1'-

Acq. Data Name: 11JUN067A

Internal Sample Id: VJR-123B

Ionization Mode: ESI+

MS Calibration Name: YOKUDELNA\_ES+\_2000

Reduction History: Correct Base[5.0%]; Average[MS[1] 0.081..0.117]

Experiment Date/Time: 6/16/2011 9:55:51 AM

Orifice1 Volt Sweep: 15V

Acquired m/z Range: 50.0..1000.0

Spec. Record Interval: 0.4[s]

Ring Lens Volt: 11[V]

Time of Maximum: 0.088[min]

Operator Name: admin

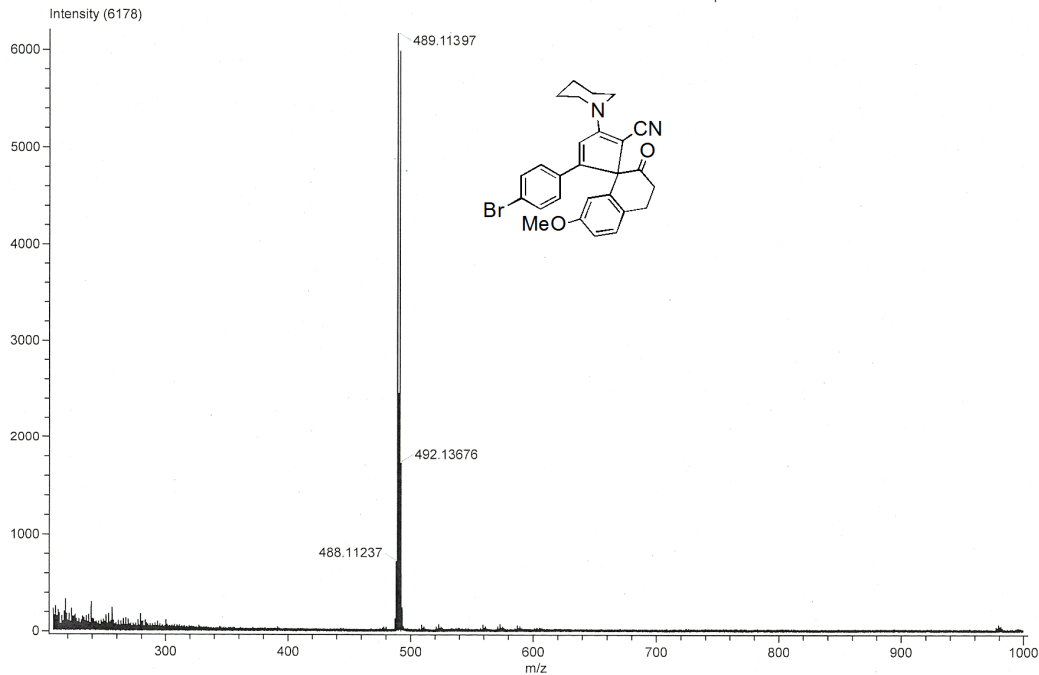

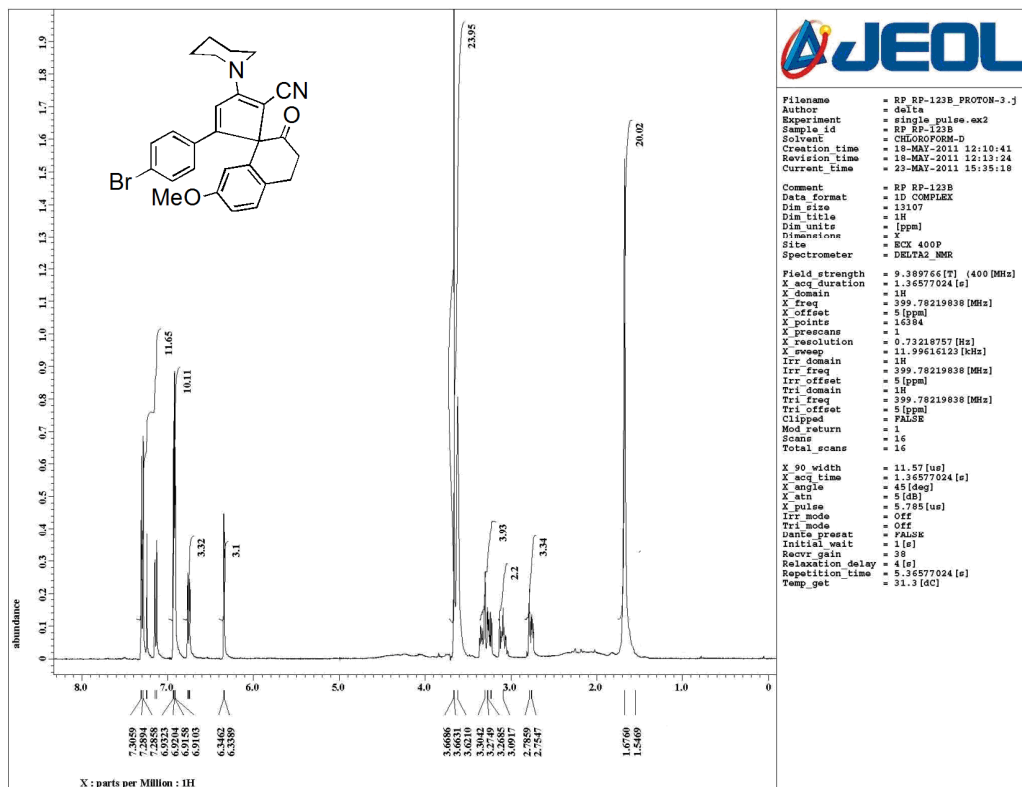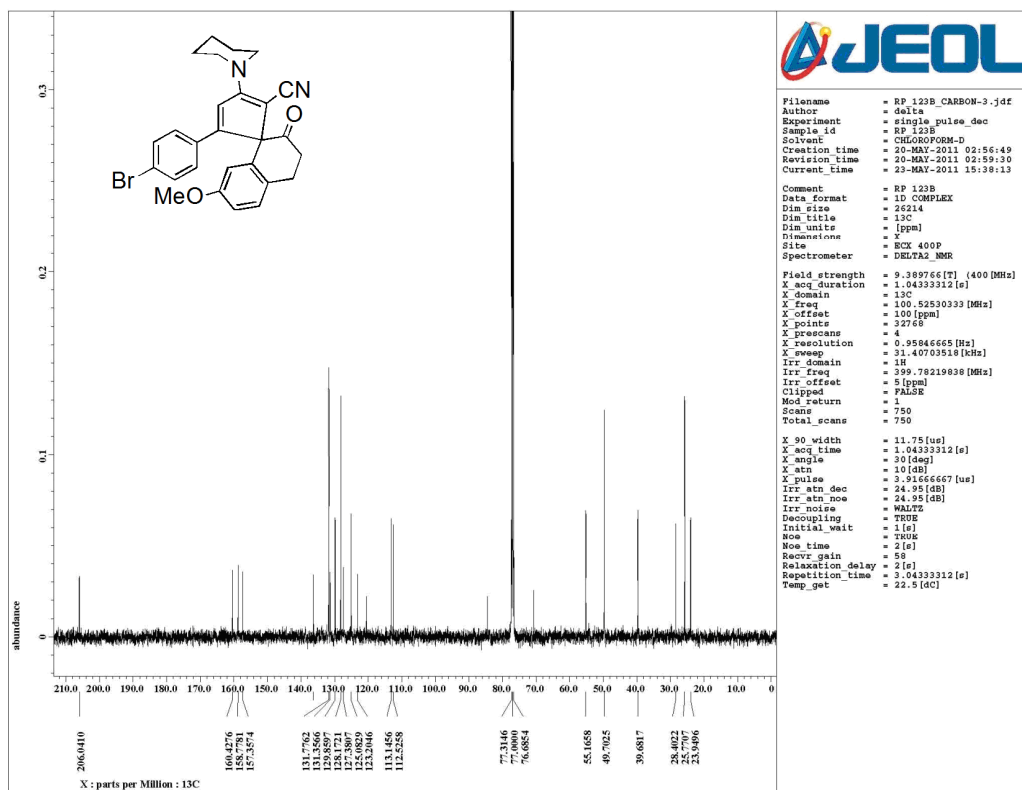

7'-methoxy-3-morpholino-2'-oxo-3',4'-dihydro-2'H,4H-spiro[cyclopenta[c]thiochromene-1,1'-naphthalene]-2-carbonitrile (17a):

Acq. Data Name: 10FEB119A  
 Internal Sample Id: VJR-77  
 Ionization Mode: ESI+  
 MS Calibration Name: YOKUDELNA\_ES+\_2000  
 Reduction History: Determine m/z/Peak Detect[Centroid,50,Area];Correct Base[5.0%];Smooth[3];Add[Correct Base[5.0%];Average(MS[1] 0.302..0.312);,1.0];Correct Base[5.0%];...  
 Experiment Date/Time: 2/11/2010 3:44:31 PM

Acq. Data Name(FullPath): E:\JAN10\FEB10\10FEB119A  
 Ion Guide RF Volt: 550V  
 Orifice1 Volt Sweep: 28V  
 Acquired m/z Range: 10.0..1050.0

Sample Comments: DART  
 Spec. Record Interval: 0.4[s]  
 Ring Lens Volt: 13[V]  
 Time of Maximum: 0.109[min]  
 Average(MS[1] 0.302..0.312);,1.0];Correct Base[5.0%];...  
 Operator Name: admin

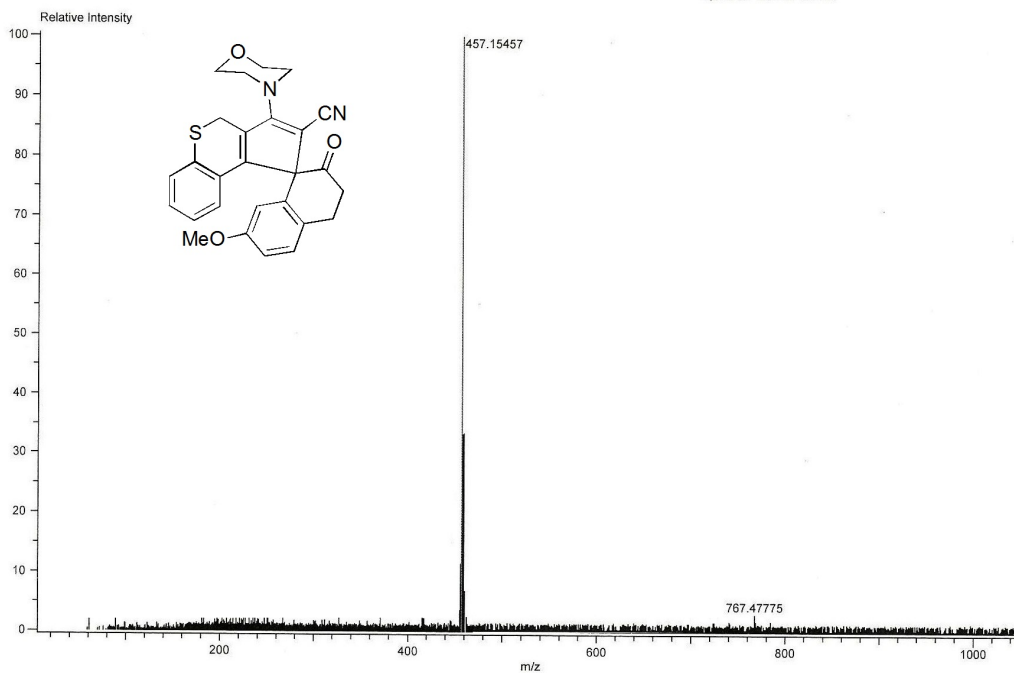

VJR-77

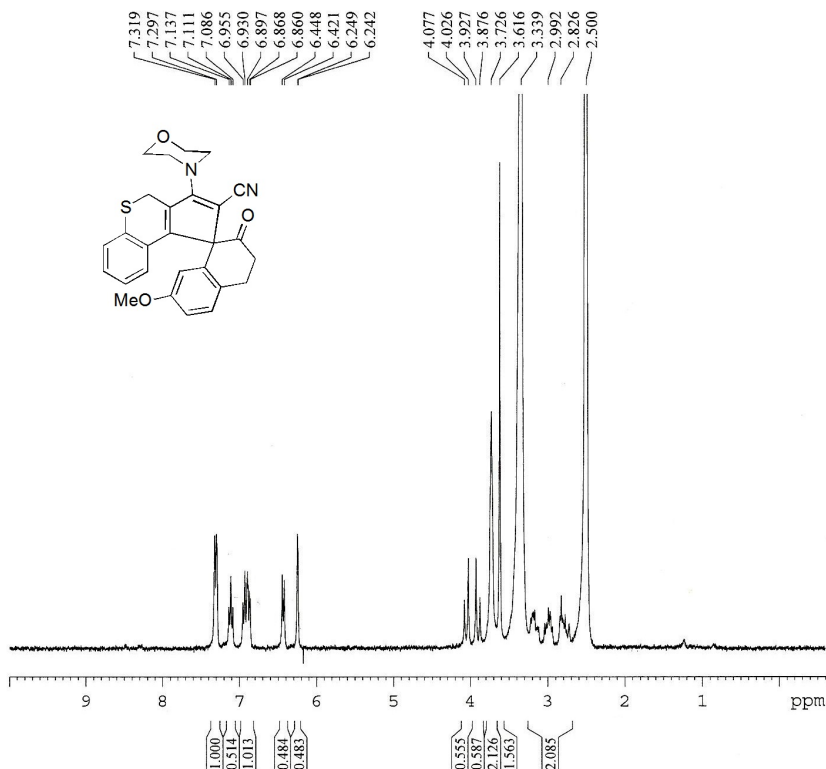

Current Data Parameters  
 NAME vjr77.temp  
 EXPNO 1  
 PROCNO 1

F2 - Acquisition Parameters  
 Date\_ 20100212  
 Time\_ 16.16  
 INSTRUM spect  
 PROBHD 5 mm Multinucl  
 PULPROG zg30  
 TD 65536  
 SOLVENT DMSO  
 NS 32  
 DS 2  
 SWH 9578.544 Hz  
 FIDRES 0.146157 Hz  
 AQ 3.4220291 sec  
 RG 1149.4  
 DW 52.200 usec  
 DE 6.00 usec  
 TE 294.2 K  
 D1 1.00000000 sec  
 MCREST 0.00000000 sec  
 MCWRK 0.01500000 sec

===== CHANNEL f1 =====  
 NUC1 1H  
 P1 6.88 usec  
 PL1 -3.00 dB  
 SFO1 300.1318534 MHz

F2 - Processing parameters  
 SI 32768  
 SF 300.1300005 MHz  
 WDW EM  
 SSB 0  
 LB 0.30 Hz  
 GB 0  
 PC 1.00

VJR-77

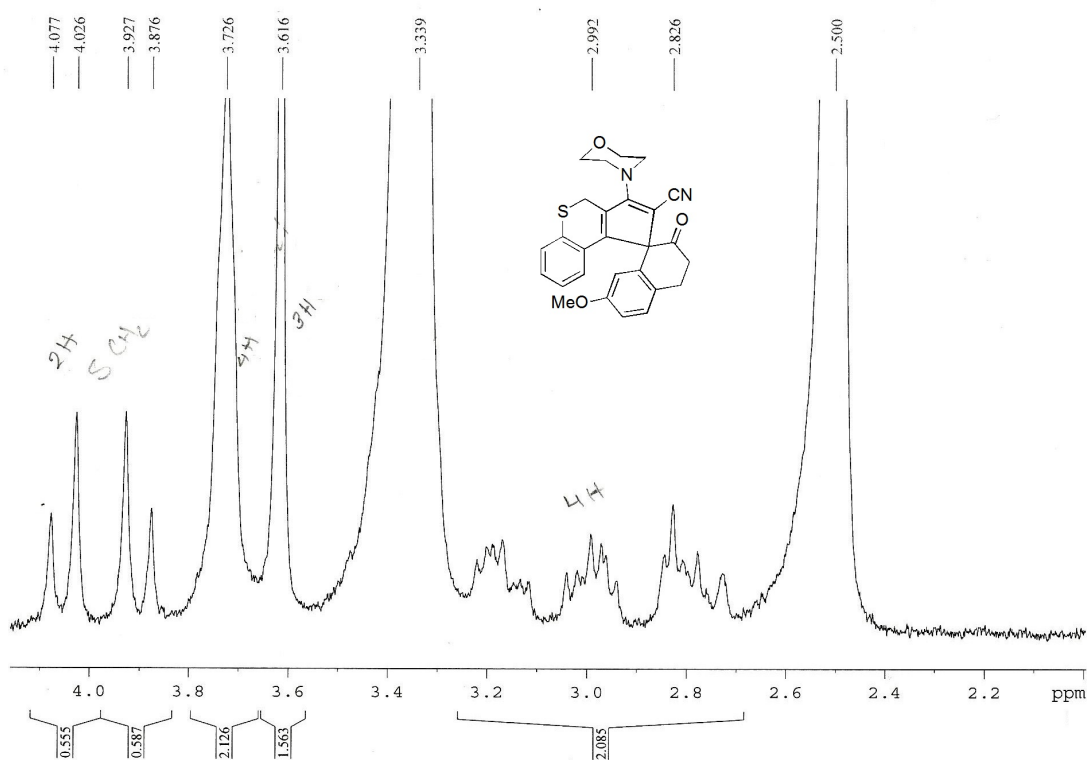

VJR-77

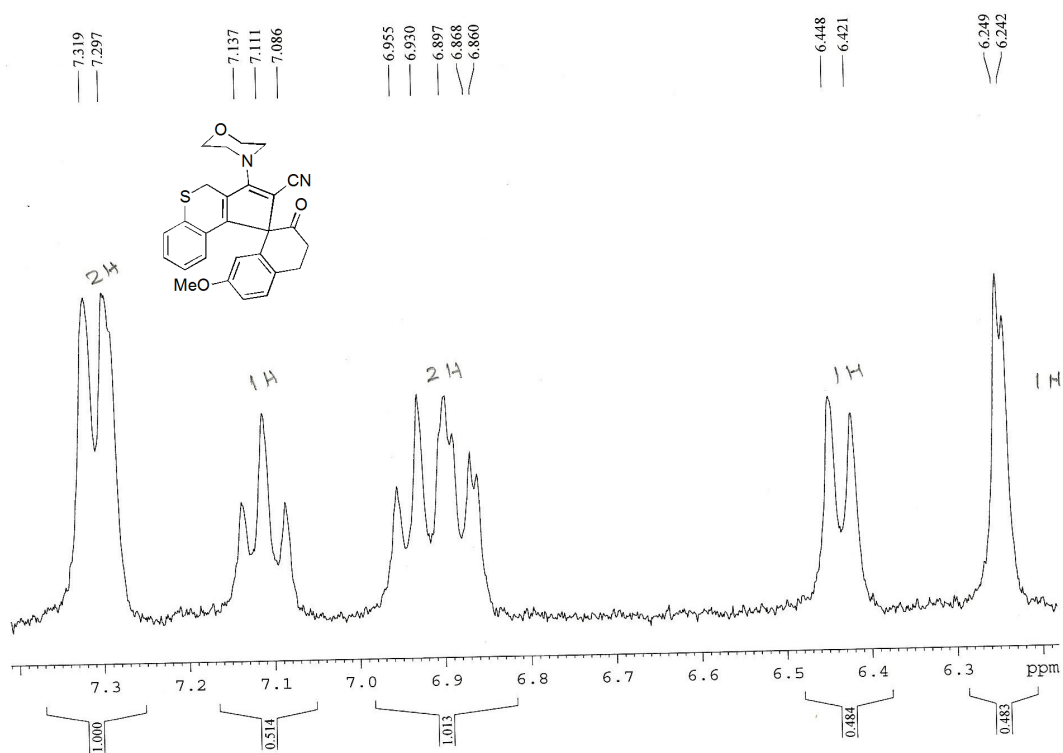

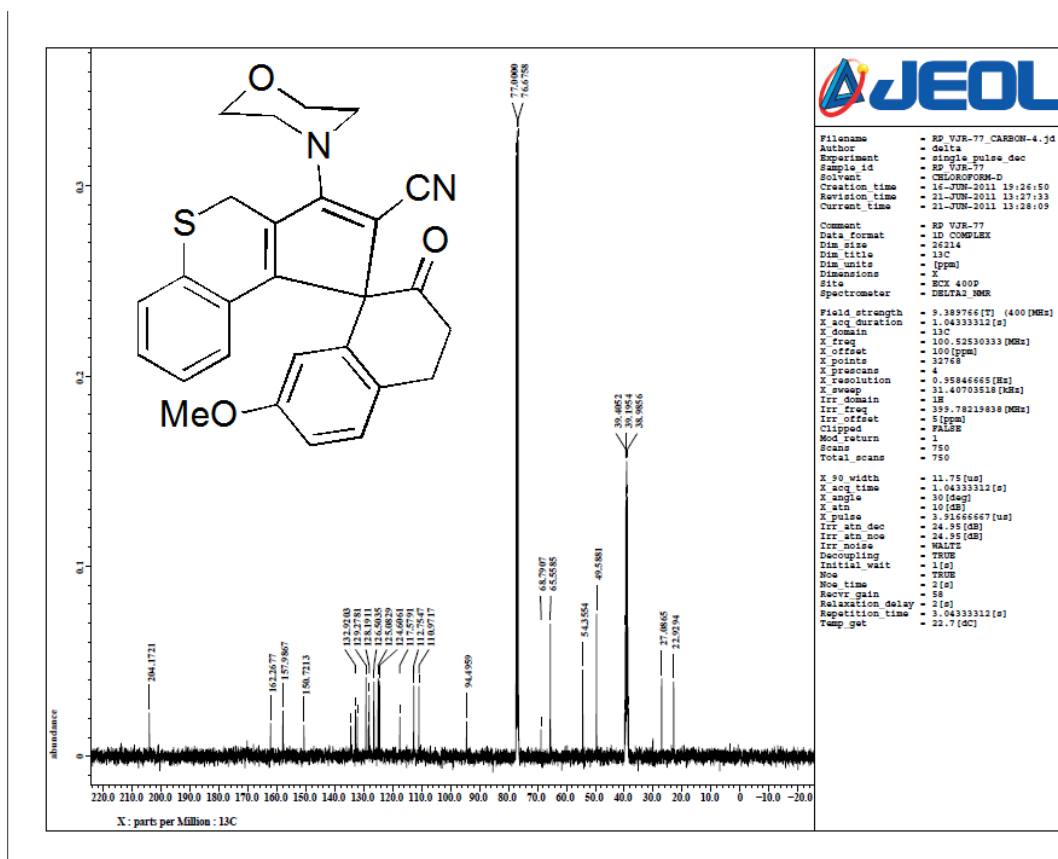

7'-methoxy-2'-oxo-3-(piperidin-1-yl)-3',4'-dihydro-2'H,4H-spiro[cyclopenta[c]thiochromene-1,1'-naphthalene]-2-carbonitrile (17b):

Acq. Data Name: 10JAN076A  
 Internal Sample Id: VJR-106  
 Ionization Mode: ESI+  
 MS Calibration Name: YOKUDELNA\_ES+\_2000  
 Reduction History: Correct Base[5.0%];Average(MS[1] 0.081, 0.086)  
 Experiment Date/Time: 1/19/2011 4:54:51 PM

Spec. Record Interval: 0.4[s]  
 Ring Lens Volt: 11[V]  
 Time of Maximum: 0.094[min]  
 Operator Name: admin

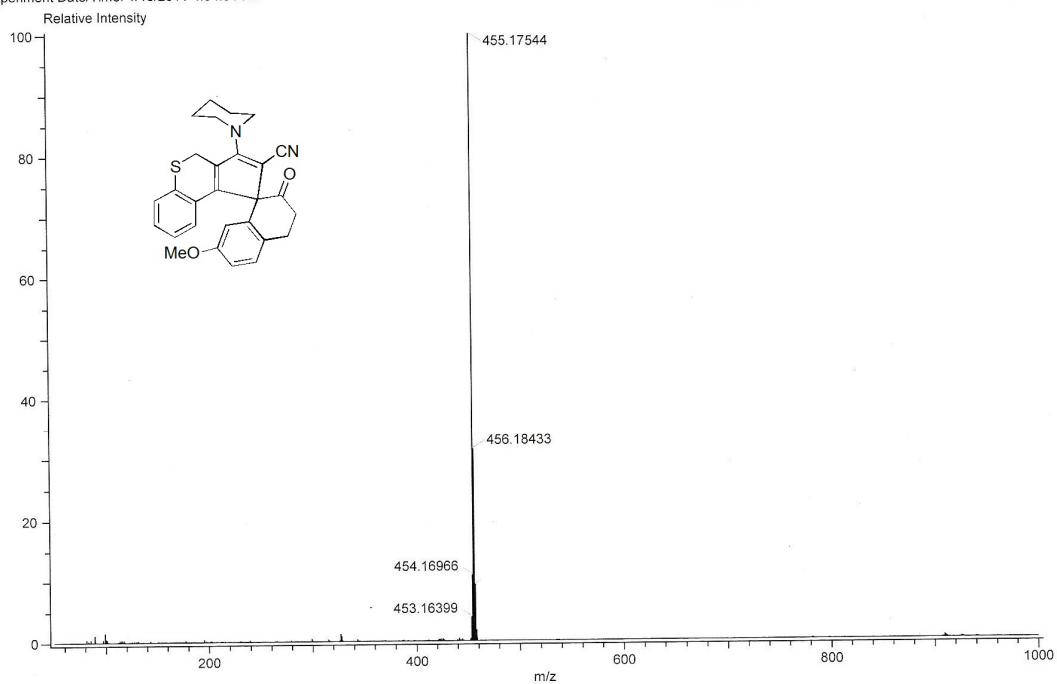

AM-106

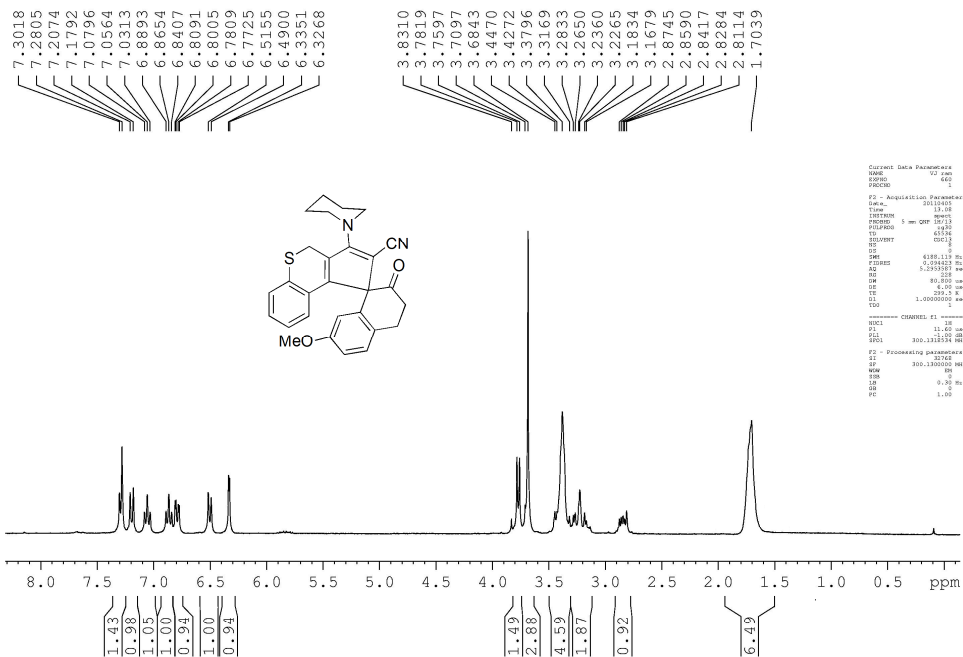

Current Data Parameters  
 NAME: VJR-106  
 EXPNO: 602  
 PROCNO: 1  
 F2 - Acquisition Parameters  
 Date\_ : 10/19/2011  
 Time: 13.08  
 INSTRUM: spect  
 PULPROG: zgpg30  
 POLPRG2: zgpg30  
 VS: 400  
 NS: 600  
 DS: 4  
 SWH: 8000.000 Hz  
 FIDRES: 0.094327 Hz  
 AQ: 0.25000000 sec  
 RG: 80.000 used  
 GB: 0.00000000 sec  
 SE: 30.00 Hz  
 SI: 1.00000000 sec  
 SFO: 400.1313534 MHz  
 ===== CHANNEL f1 =====  
 NU1: 1  
 PC1: 11.00 used  
 PS: 11.00000000 sec  
 SFO1: 300.1313534 MHz  
 F2 - Processing parameters  
 F1: 400.1313534 MHz  
 F2: 300.1313534 MHz  
 WOH: 80  
 LB: 4.00 Hz  
 GB: 0.00000000 sec  
 SE: 1.00

AM-106

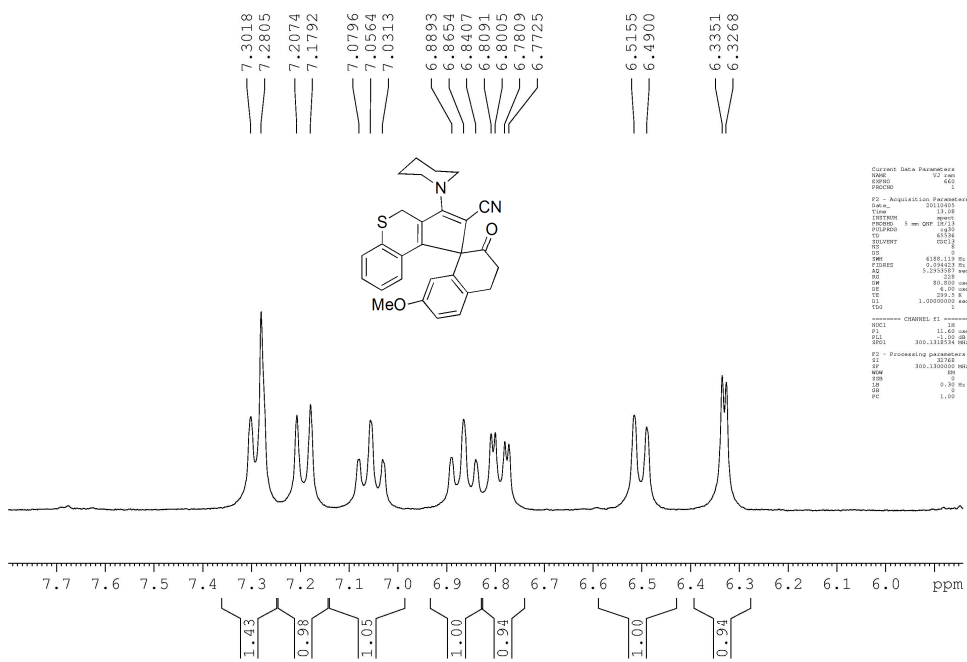

```

Current Data Parameters
Date_   12 Jan
Time_   16:02
PROCNO  1
F2 - Acquisition Parameters
Date_   20110805
Time_   11:05
INSTRUM spect
PROBHD  5 mm QNP 1H/1
PULPROG zgpg30
TD       65536
SOLVENT CDCl3
NS       8
DS       4
SWH      6188.115 Hz
FIDRES  0.29842 Hz
AQ       5.255087 sec
RG       327.5
SQ       89.810 usec
DE       4.10 usec
TE       300.2 K
D1       1.0000000 sec
===== CHANNEL f1 =====
NUC1     13C
P1       11.00 usec
PL1      0.00 dB
SFO1     100.6283500 MHz
F2 - Processing parameters
SI       300.1300000 MHz
SF       300.1300000 MHz
WDW      EM
SSB      0.00 Hz
GB       0.00 Hz
PC       1.00
    
```

AM-106

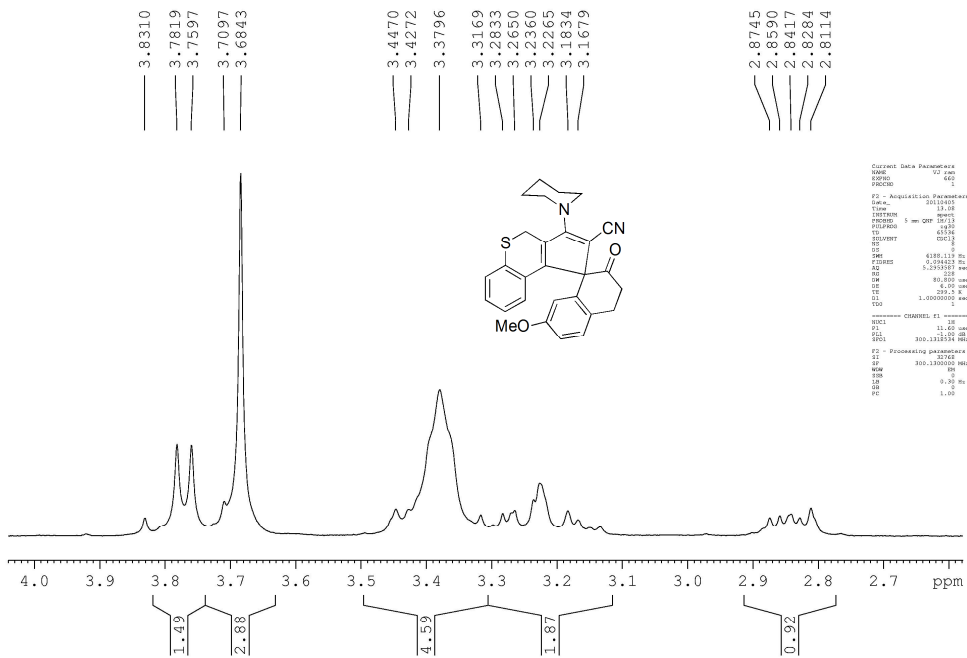

```

Current Data Parameters
Date_   12 Jan
Time_   16:02
PROCNO  1
F2 - Acquisition Parameters
Date_   20110805
Time_   11:05
INSTRUM spect
PROBHD  5 mm QNP 1H/1
PULPROG zgpg30
TD       65536
SOLVENT CDCl3
NS       8
DS       4
SWH      6188.115 Hz
FIDRES  0.29842 Hz
AQ       5.255087 sec
RG       327.5
SQ       89.810 usec
DE       4.10 usec
TE       300.2 K
D1       1.0000000 sec
===== CHANNEL f1 =====
NUC1     13C
P1       11.00 usec
PL1      0.00 dB
SFO1     100.6283500 MHz
F2 - Processing parameters
SI       300.1300000 MHz
SF       300.1300000 MHz
WDW      EM
SSB      0.00 Hz
GB       0.00 Hz
PC       1.00
    
```

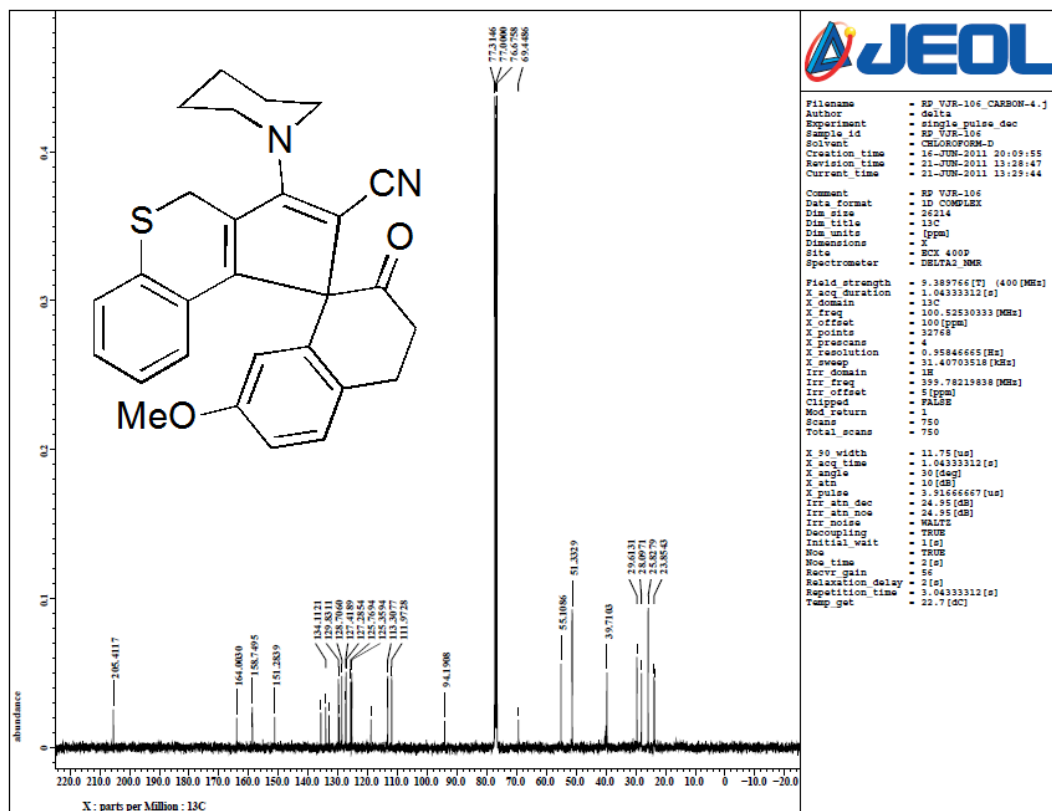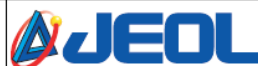

```

Filename      - EP VJR-106 CARBON-4.j
Author       - delta
Experiment   - single pulse_dac
Sample Id    - EP VJR-106
Solvent      - CDCl3
Creation time - 16-JUN-2011 20:09:55
Revision time - 21-JUN-2011 13:28:47
Current time  - 21-JUN-2011 13:29:44

Comment      - EP VJR-106
Data format  - 1D COMPLEX
Dir size     - 26214
Dir title    - 13C
Dir units    - [ppm]
Dimensions   - X
Site         - EXI 400P
Spectrometer - DELTA2 NMR

Field strength - 9.389766 [T] (400 [MHz])
X_acq duration - 1.04333312 [s]
X_domain       - 13C
X_freq         - 100.62530333 [MHz]
X_offset       - 100 [ppm]
X_points       - 32768
X_procscans   - 4
X_resolution   - 0.38848688 [Hz]
X_sweep        - 31.40703518 [kHz]
Irr_domain     - 1B
Irr_freq       - 399.78219838 [MHz]
Irr_offset     - 5 [ppm]
Clipped        - FALSE
Mod return     - 1
Scans          - 750
Total_scans    - 750

X_90 width    - 11.75 [us]
X_acq time    - 1.04333312 [s]
X_angle       - 30 [deg]
X_atn         - 10 [dB]
X_pulse       - 3.9466667 [us]
Irr_atn dac   - 24.95 [dB]
Irr_atn mod   - 24.95 [dB]
Irr_noise     - Waifs
Decoupling    - TRUE
Initial wait   - 2 [s]
Mod           - TRUE
Mod time      - 2 [s]
Recvr gain    - 56
Relaxation delay - 2 [s]
Repetition time - 3.04333312 [s]
Temp_set      - 22.7 [degC]
    
```

**6'-methoxy-2'-oxo-3-(piperidin-1-yl)-3',4'-dihydro-2'H,4H-spiro[cyclopenta[c]thiochromene-1,1'-naphthalene]-2-carbonitrile (17c):**

Acq. Data Name: 11FEB034A  
 Internal Sample Id: VJR-106  
 Ionization Mode: ESI+  
 MS Calibration Name: YOKUDELNA\_ES+\_2000  
 Reduction History: Correct Base[5.0%]; Average(MS[1] 0.409..0.425)  
 Experiment Date/Time: 2/7/2011 2:08:04 PM

Spec. Record Interval: 0.4[s]  
 Ring Lens Volt: 11[V]  
 Time of Maximum: 0.417[min]

Operator Name: admin

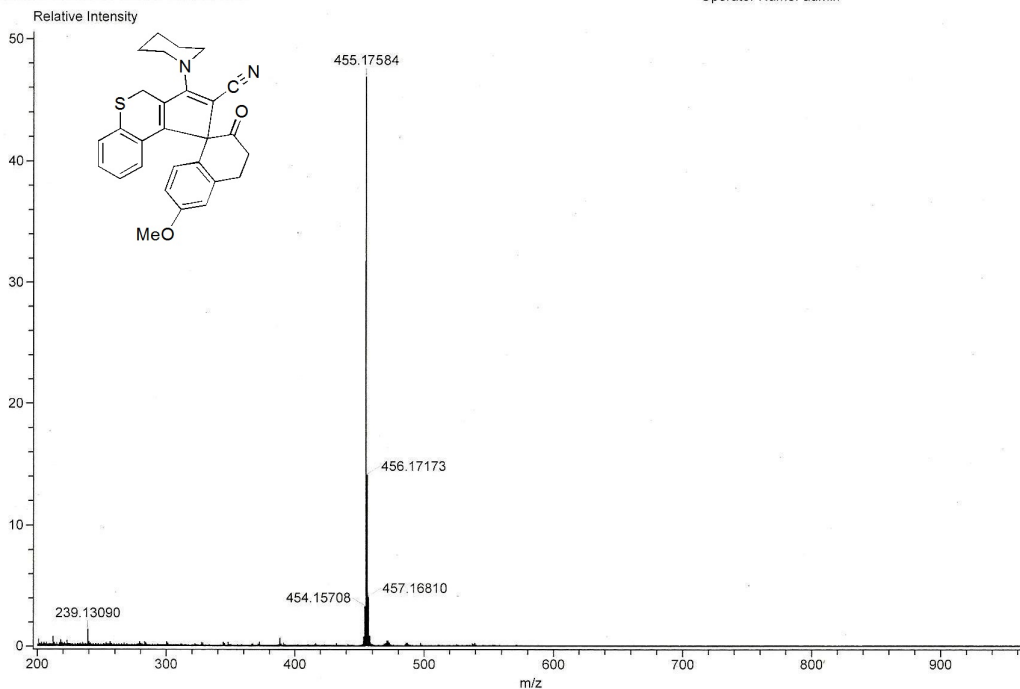



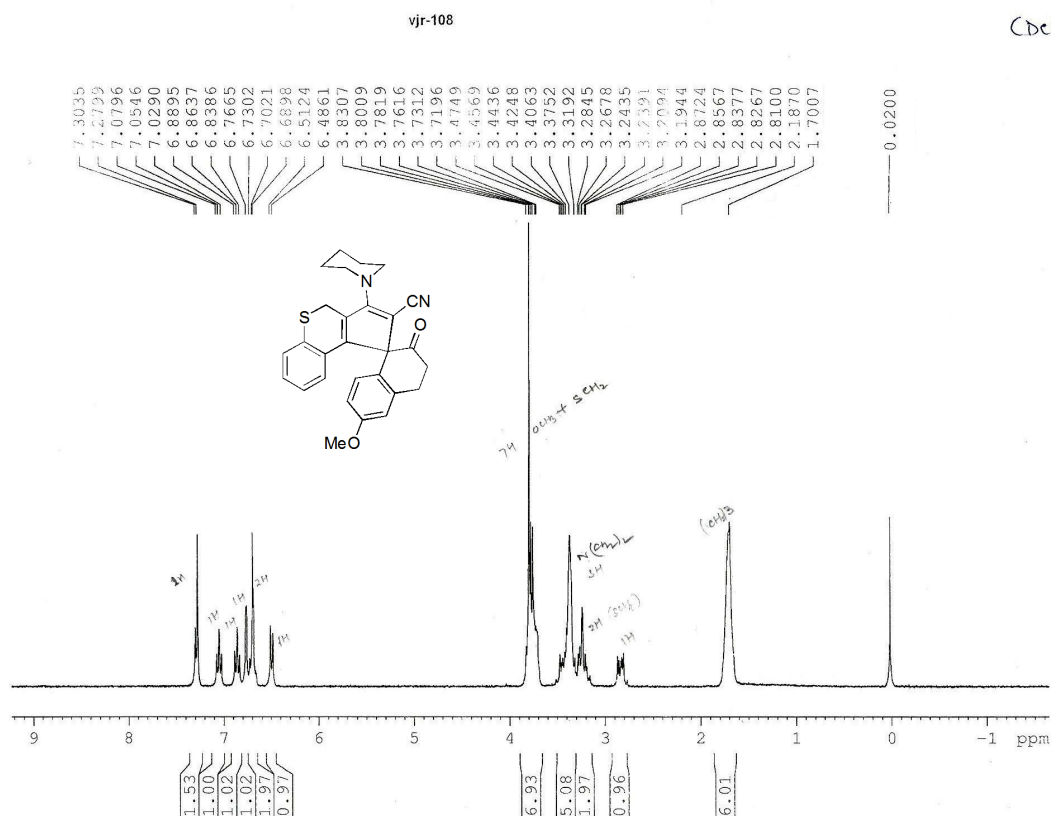

**8-chloro-6'-methoxy-2'-oxo-3-(piperidin-1-yl)-3',4'-dihydro-2'H,4H-spiro[cyclopenta[c]thiochromene-1,1'-**

**naphthalene]-2-carbonitrile (17d):**

Acq. Data Name: 11FEB032A  
 Internal Sample Id: VJR-109  
 Ionization Mode: ESI+  
 MS Calibration Name: YOKUDELNA\_ES+\_2000  
 Reduction History: Correct Base[5.0%];Average[MS[1]0.100.0.112]  
 Experiment Date/Time: 2/7/2011 2:03:46 PM

Orifice1 Volt Sweep: 15V  
 Acquired m/z Range: 50.0..1000.0

Spec. Record Interval: 0.4[s]  
 Ring Lens Volt: 11[V]  
 Time of Maximum: 0.102[min]

Operator Name: admin

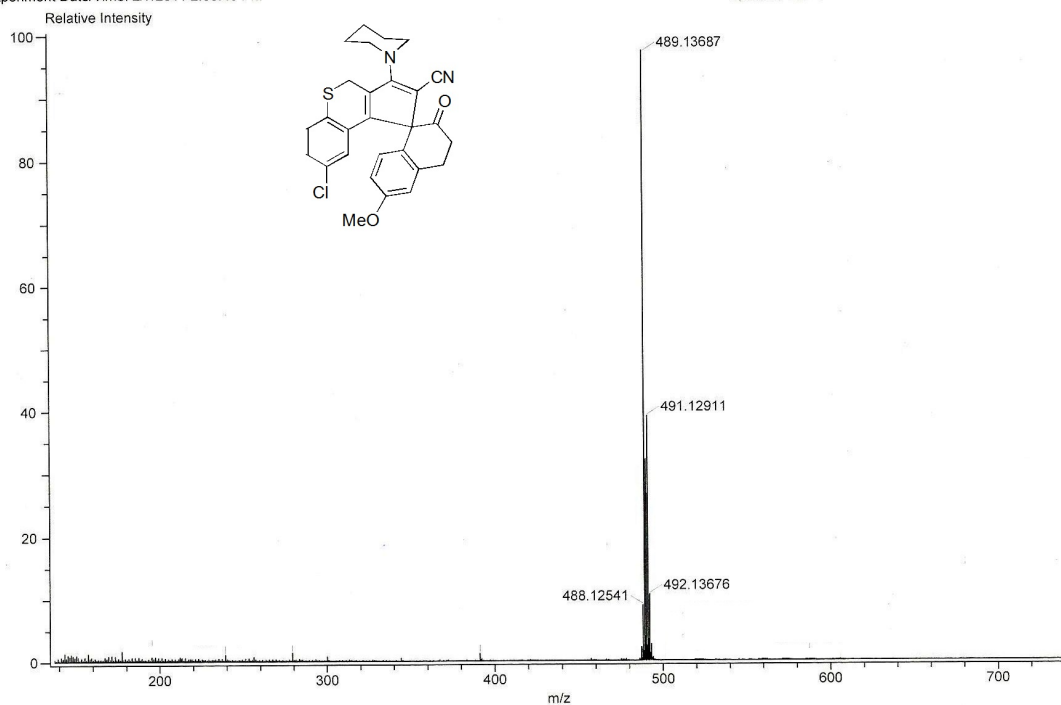

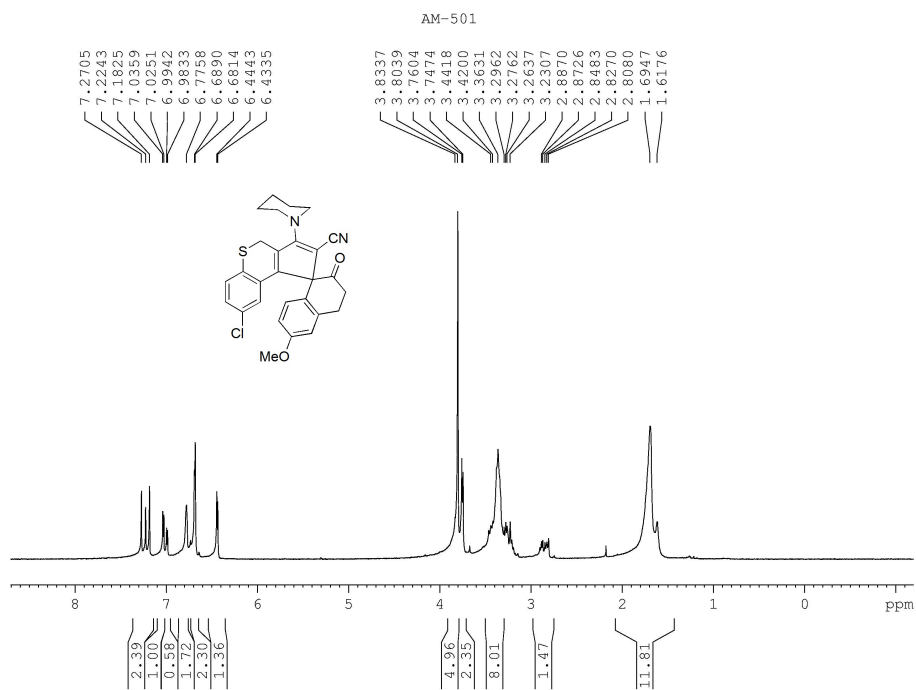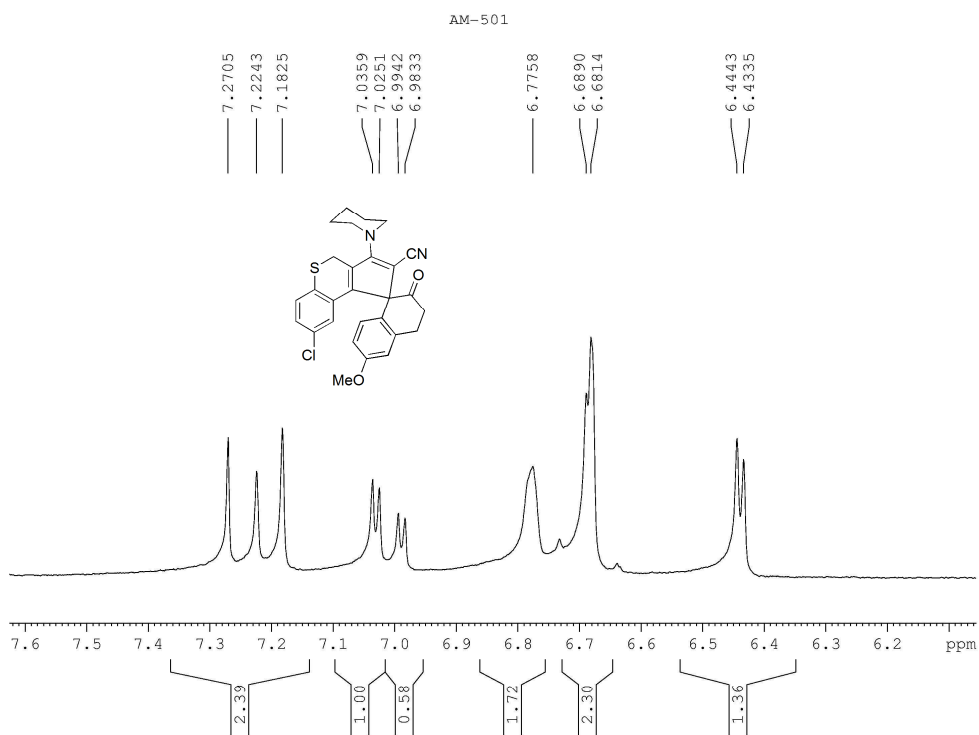

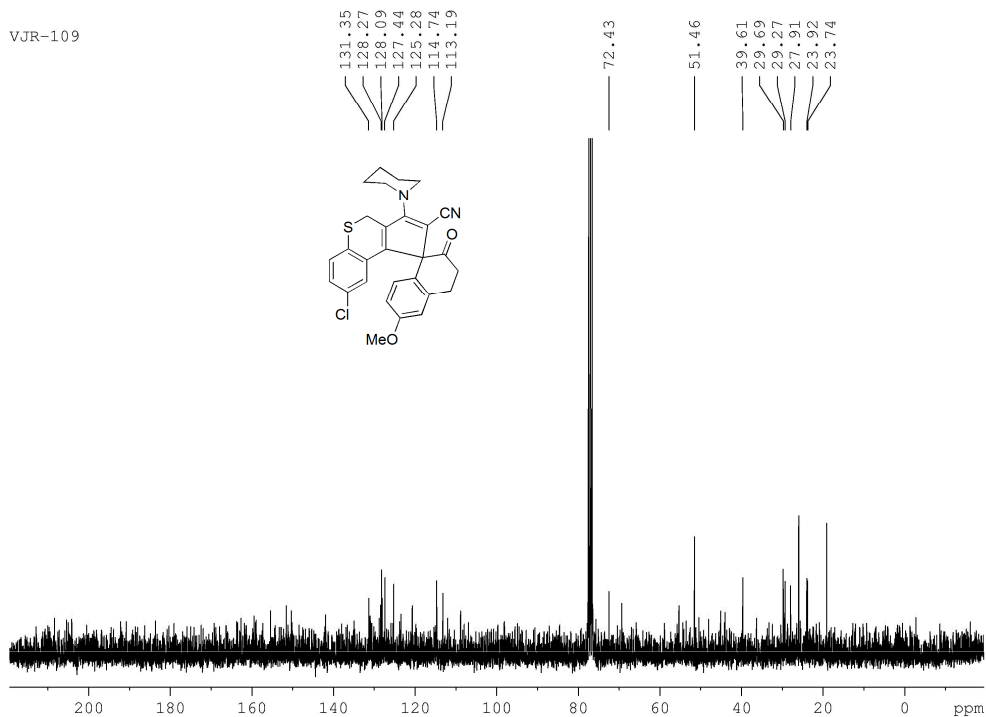

**6'-methoxy-2'-oxo-3-(piperidin-1-yl)-3',4,4',5-tetrahydro-2'H-spiro[cyclopenta[a]naphthalene-1,1'-naphthalene]-2-carbonitrile (17e):**

Acq. Data Name: 11FEB033A

Internal Sample Id: VJR-110

Ionization Mode: ESI+

MS Calibration Name: YOKUDELNA\_ES+\_2000

Reduction History: Correct Base[5.0%];Average(MS[1] 0.045..0.195)

Experiment Date/Time: 2/7/2011 2:05:11 PM

Orifice1 Volt Sweep: 15V

Acquired m/z Range: 50.0..1000.0

Spec. Record Interval: 0.4[s]

Ring Lens Volt: 11[V]

Time of Maximum: 0.103[min]

Operator Name: admin

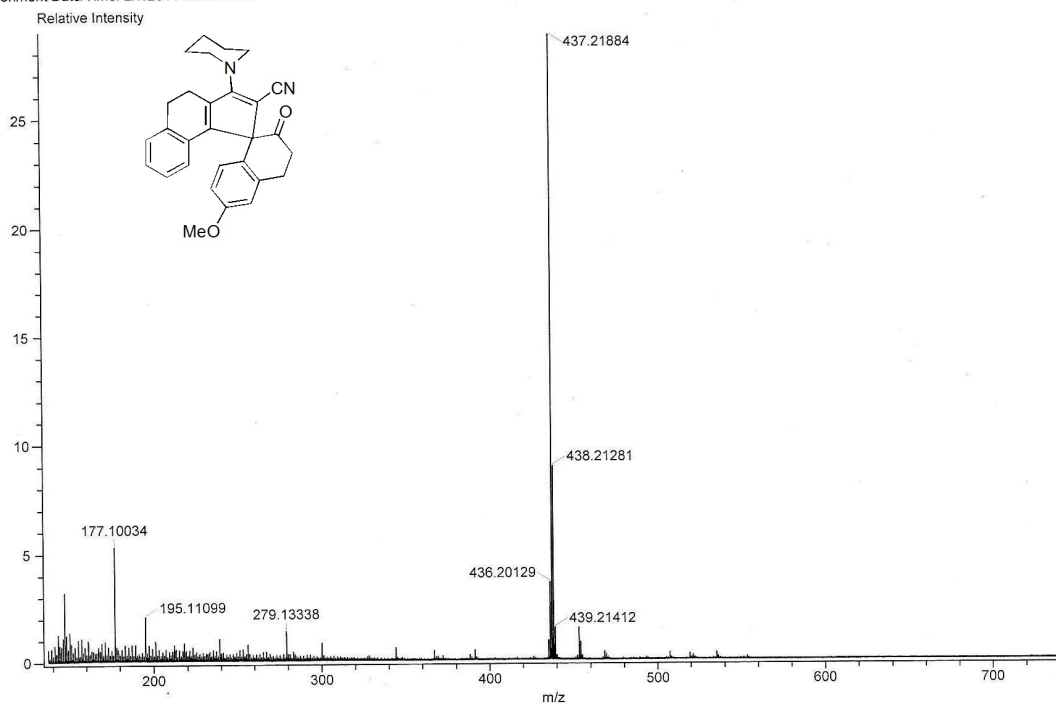

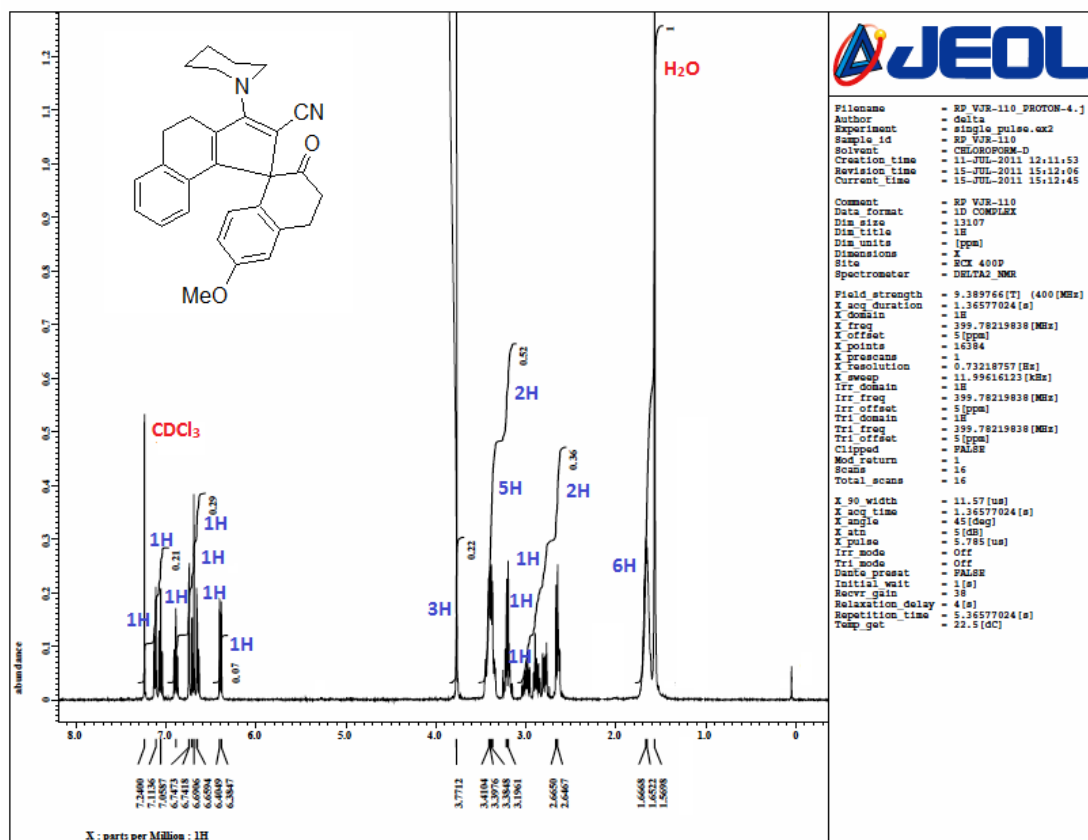

**2'-oxo-3-(piperidin-1-yl)-3',4'-dihydro-2'H,4H-spiro[cyclopenta[c]thiochromene-1,1'-naphthalene]-2-carbonitrile (17f):**

Acq. Data Name: 11FEB145A  
 Internal Sample Id: VJR-112  
 Ionization Mode: ESI+  
 MS Calibration Name: YOKUDELNA\_ES+ 2000  
 Reduction History: Determine m/z[Peak Detect[Centroid,50,Area];Correct Base[5.0%];Smooth[3]];Add[Correct Base[5.0%];Average[MS[1] 0.162..0.163];1.0];Correct Base[5.0%];...

Orifice1 Volt Sweep: 15V  
 Acquired m/z Range: 50.0..1000.0

Spec. Record Interval: 0.4[s]  
 Ring Lens Volt: 11[V]  
 Time of Maximum: 0.083[min]  
 Operator Name: admin

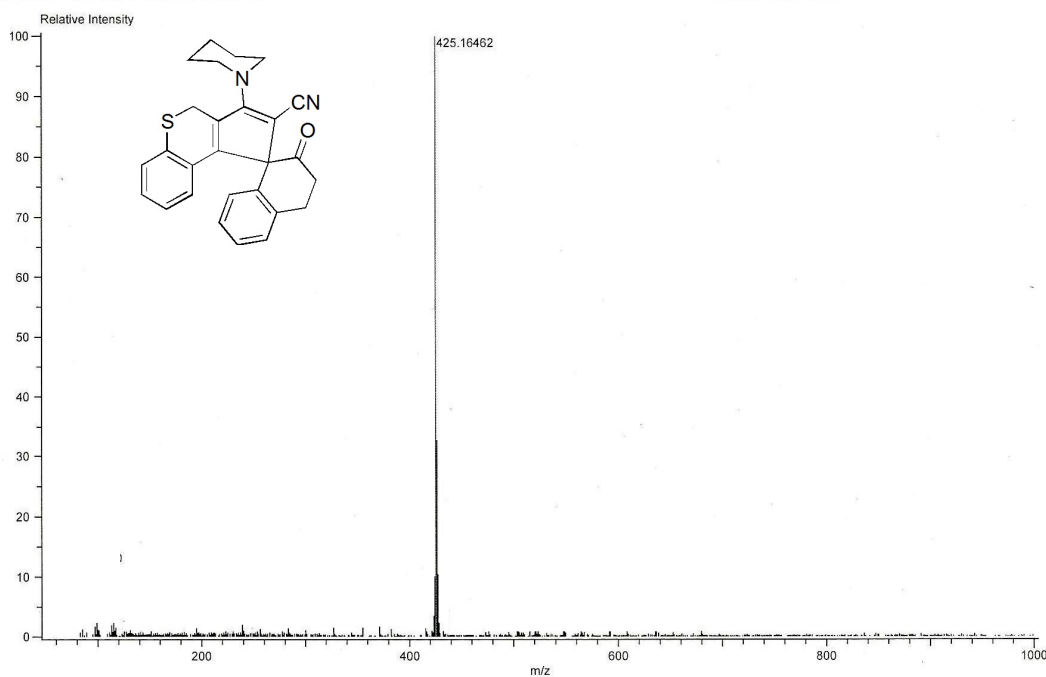

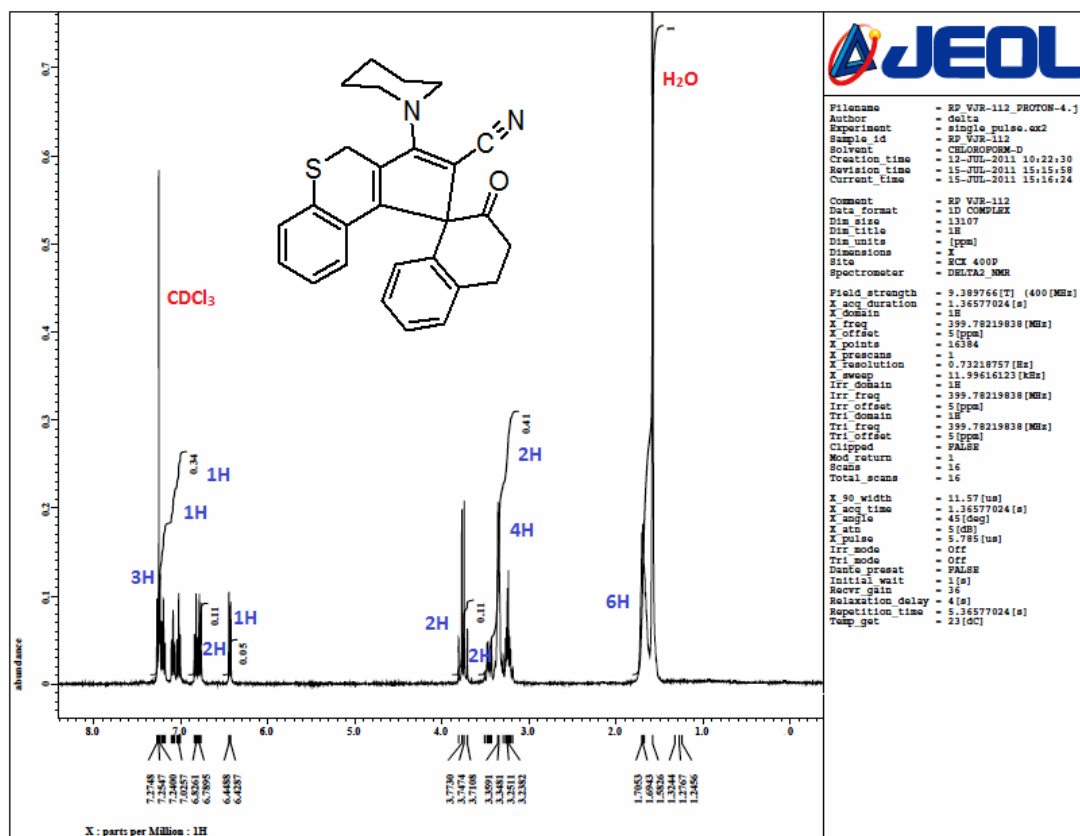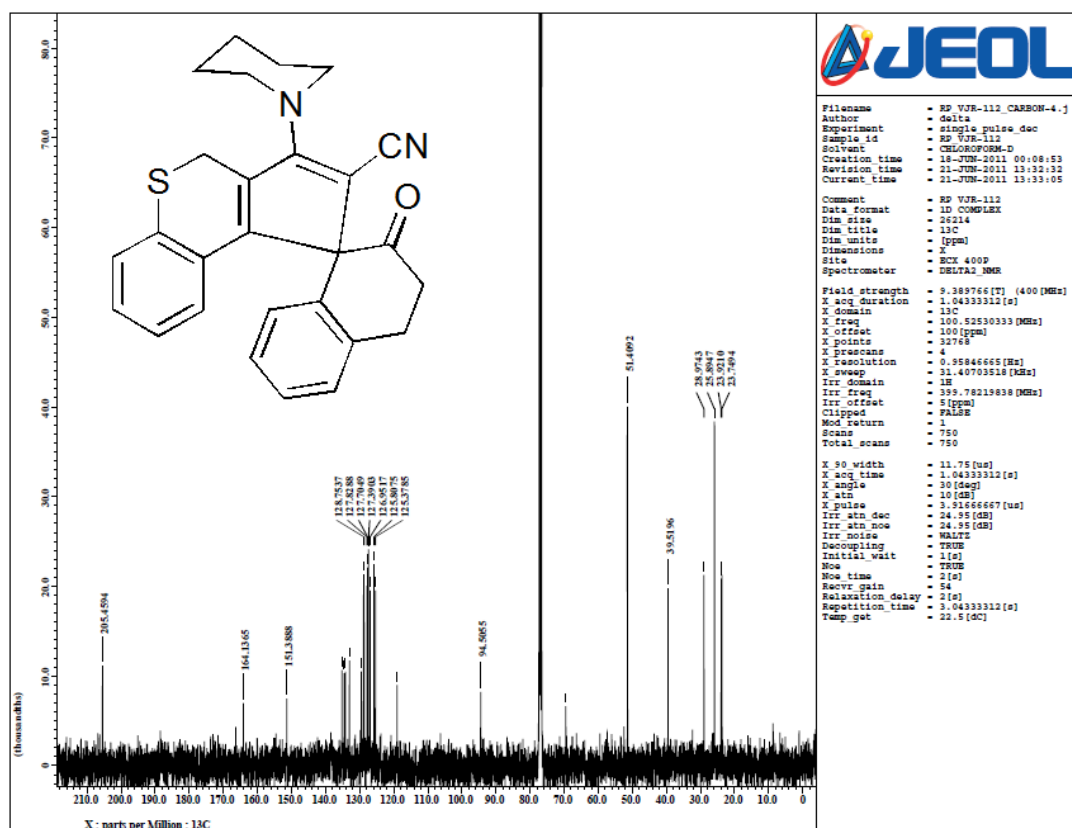

6'-methoxy-2'-oxo-3-(4-phenylpiperazin-1-yl)-3',4'-dihydro-2'H,4H-spiro[cyclopenta[c]thiochromene-1,1'-naphthalene]-2-carbonitrile (12g):

thiochromene-1,1'-

Acq. Data Name: 11FEB144A  
 Internal Sample Id: VJR-113  
 Ionization Mode: ESI+  
 MS Calibration Name: YOKUDELNA\_ES+\_2000  
 Reduction History: Correct Base[5.0%]; Average(MS[1]) 0.106..0.110  
 Experiment Date/Time: 2/15/2011 3:43:04 PM

Spec. Record Interval: 0.4[s]  
 Ring Lens Volt: 11[V]  
 Time of Maximum: 0.109[min]  
 Operator Name: admin

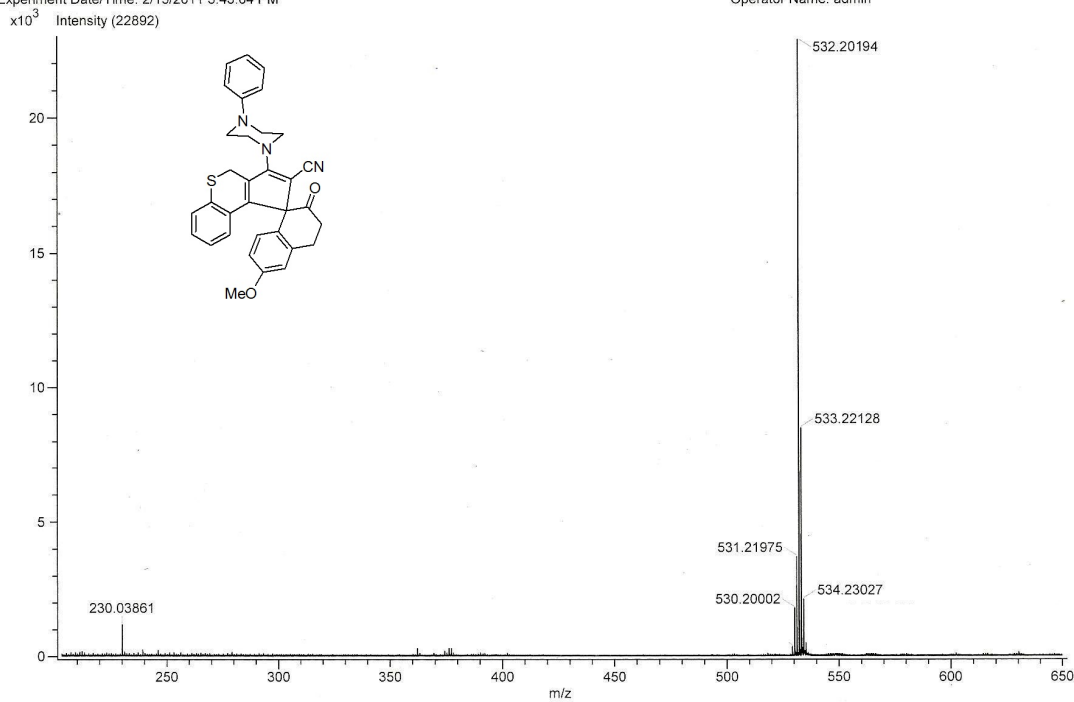

AM-512

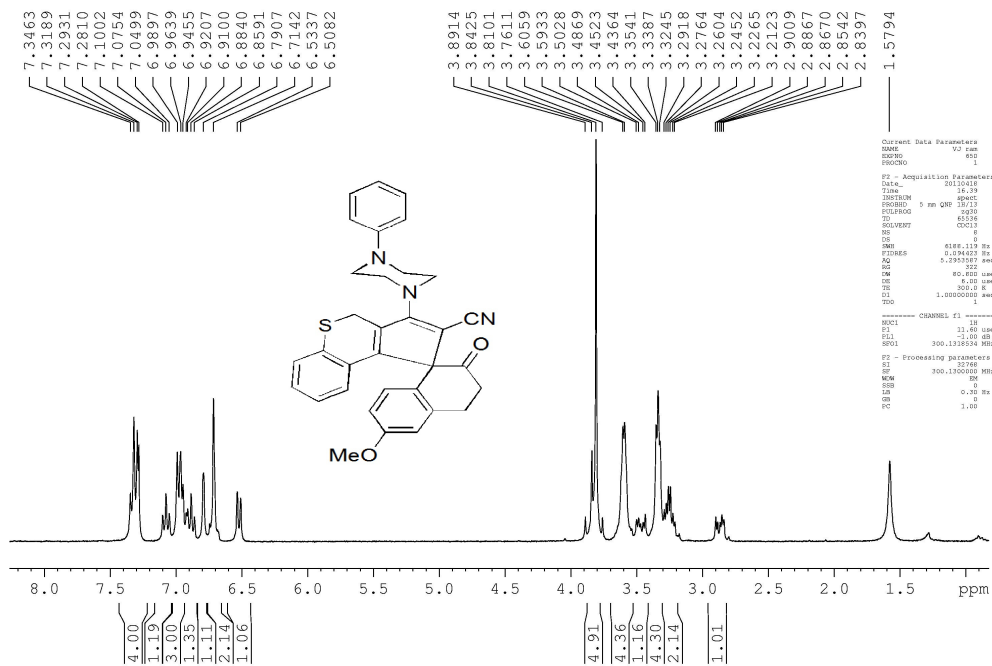

AM-512

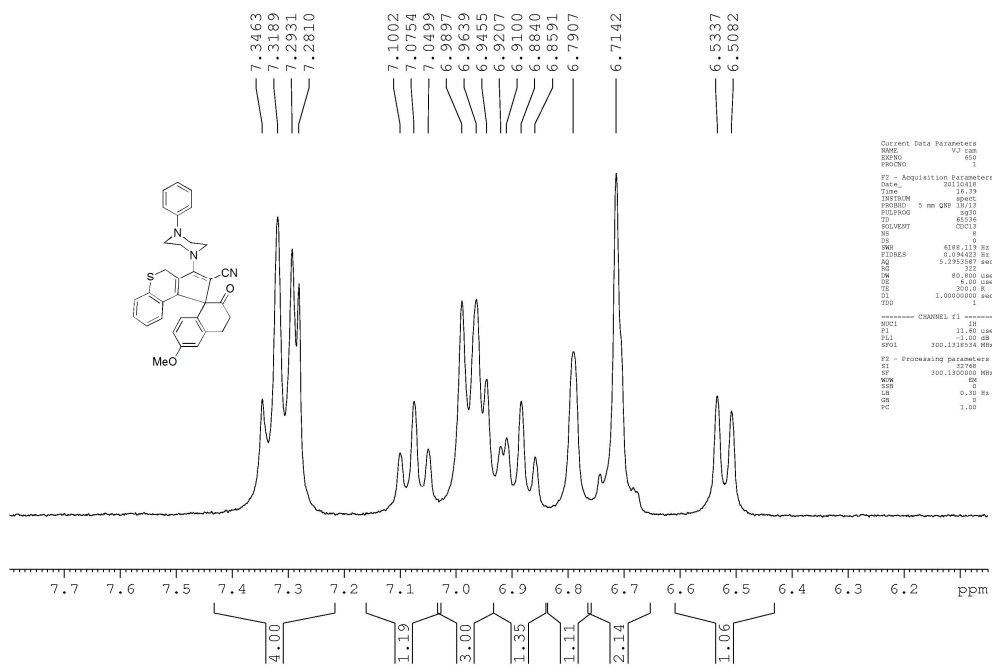

AM-512

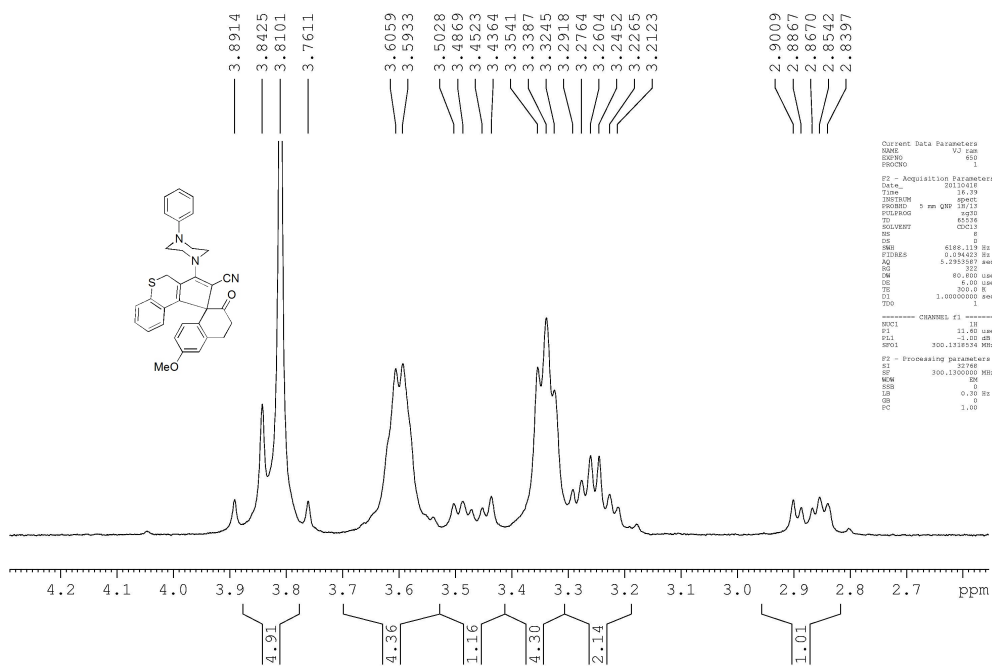

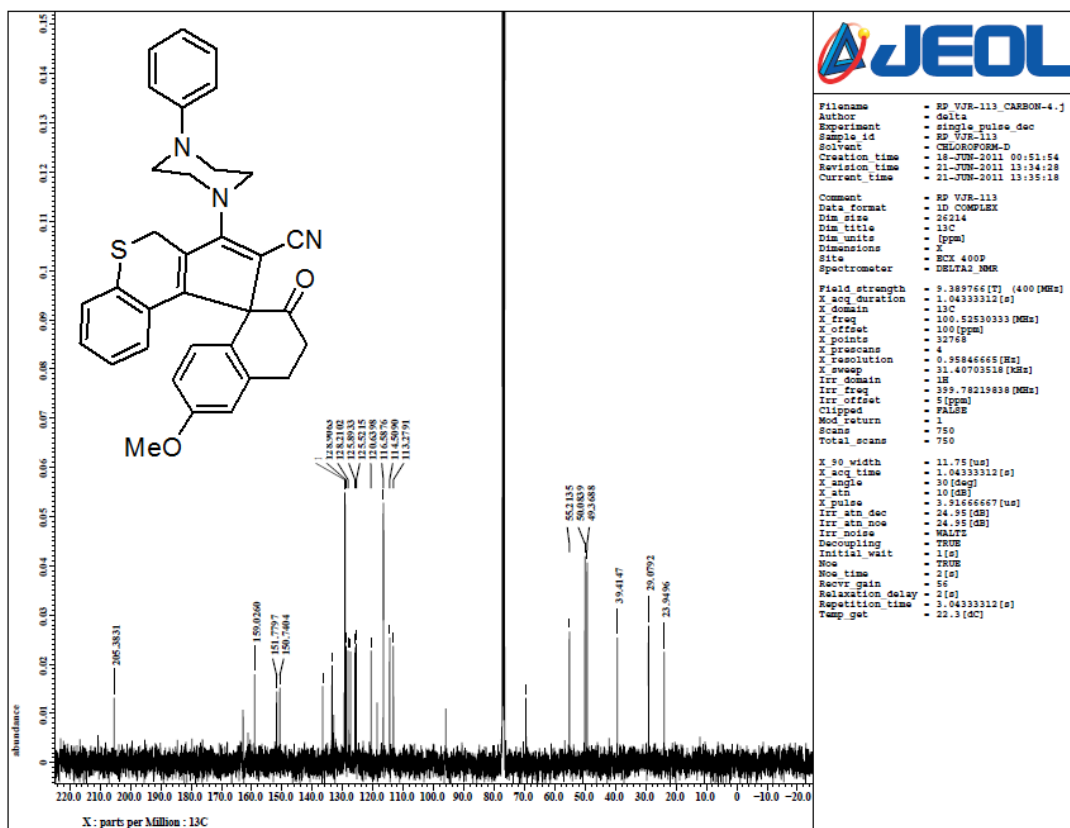

Supplement: c2ra21587j.pdf [file c2ra21587j.pdf]
